# Supplementary material for: Variations in 5-methylcytosine and 5-hydroxymethylcytosine among human brain, blood, and saliva using oxBS and the Infinium MethylationEPIC array
Source: PubMed Central journal article supplement — Biol Methods Protoc. 2016 Dec 27;1(1):1–8. doi: 10.1093/biomethods/bpw002 (PMC7164292; doi:10.1093/biomethods/bpw002), 2016-12-27
Supplement: supplementary_table_s1.pdf [file supplementary_table_s1.pdf]

**Supplementary Table S1: Significant GO terms (p < 0.01) related to the 2,528 5hmC-containing probes common in brain, blood, and saliva.**

Category = Gene ontology category

Over\_represented pvalue = p-value of the overrepresented gene ontology term

Number DE In Cat = The number of differentially expressed genes in the gene ontology category

Number In Cat = The total number of genes in the gene ontology category

GO term = Specific gene ontology term in the category

| Category   | over_represented pvalue | number DE In Cat | number In Cat | GO term                                                |
|------------|-------------------------|------------------|---------------|--------------------------------------------------------|
| GO:0002376 | 5.40E-09                | 280              | 2574          | immune system process                                  |
| GO:0019899 | 4.49E-08                | 225              | 1691          | enzyme binding                                         |
| GO:0050778 | 9.33E-08                | 90               | 634           | positive regulation of immune response                 |
| GO:0009607 | 9.67E-08                | 106              | 934           | response to biotic stimulus                            |
| GO:0002684 | 1.24E-07                | 117              | 902           | positive regulation of immune system process           |
| GO:0007159 | 1.25E-07                | 74               | 478           | leukocyte cell-cell adhesion                           |
| GO:0045321 | 1.33E-07                | 98               | 708           | leukocyte activation                                   |
| GO:0043207 | 2.02E-07                | 102              | 899           | response to external biotic stimulus                   |
| GO:0051707 | 2.02E-07                | 102              | 899           | response to other organism                             |
| GO:0070486 | 2.20E-07                | 70               | 445           | leukocyte aggregation                                  |
| GO:0006955 | 3.03E-07                | 178              | 1655          | immune response                                        |
| GO:0034109 | 6.53E-07                | 77               | 507           | homotypic cell-cell adhesion                           |
| GO:0002252 | 7.83E-07                | 93               | 755           | immune effector process                                |
| GO:0005515 | 1.17E-06                | 933              | 10458         | protein binding                                        |
| GO:0050776 | 1.43E-06                | 121              | 971           | regulation of immune response                          |
| GO:0045576 | 1.85E-06                | 16               | 51            | mast cell activation                                   |
| GO:0098542 | 2.38E-06                | 62               | 543           | defense response to other organism                     |
| GO:0001775 | 2.83E-06                | 121              | 946           | cell activation                                        |
| GO:0002757 | 2.85E-06                | 71               | 456           | immune response-activating signal transduction         |
| GO:0046649 | 3.62E-06                | 83               | 603           | lymphocyte activation                                  |
| GO:0002274 | 3.73E-06                | 31               | 157           | myeloid leukocyte activation                           |
| GO:0033003 | 6.05E-06                | 12               | 34            | regulation of mast cell activation                     |
| GO:0071593 | 6.98E-06                | 65               | 438           | lymphocyte aggregation                                 |
| GO:0065010 | 7.11E-06                | 265              | 2714          | extracellular membrane-bounded organelle               |
| GO:0070062 | 7.11E-06                | 265              | 2714          | extracellular exosome                                  |
| GO:0043230 | 7.22E-06                | 266              | 2727          | extracellular organelle                                |
| GO:1903561 | 7.22E-06                | 266              | 2727          | extracellular vesicle                                  |
| GO:0042110 | 1.11E-05                | 64               | 437           | T cell activation                                      |
| GO:0070489 | 1.11E-05                | 64               | 437           | T cell aggregation                                     |
| GO:0004674 | 1.23E-05                | 77               | 437           | protein serine/threonine kinase activity               |
| GO:0002253 | 1.41E-05                | 72               | 505           | activation of immune response                          |
| GO:0002682 | 1.78E-05                | 168              | 1499          | regulation of immune system process                    |
| GO:0002448 | 1.85E-05                | 13               | 43            | mast cell mediated immunity                            |
| GO:0050865 | 2.08E-05                | 65               | 462           | regulation of cell activation                          |
| GO:0006952 | 2.22E-05                | 180              | 1789          | defense response                                       |
| GO:0006950 | 2.57E-05                | 380              | 3947          | response to stress                                     |
| GO:0035556 | 2.87E-05                | 294              | 2608          | intracellular signal transduction                      |
| GO:0043299 | 3.05E-05                | 16               | 61            | leukocyte degranulation                                |
| GO:0005737 | 3.26E-05                | 905              | 10317         | cytoplasm                                              |
| GO:0031982 | 3.44E-05                | 344              | 3609          | vesicle                                                |
| GO:0002444 | 4.19E-05                | 17               | 75            | myeloid leukocyte mediated immunity                    |
| GO:0032418 | 4.71E-05                | 13               | 48            | lysosome localization                                  |
| GO:0002443 | 5.13E-05                | 38               | 283           | leukocyte mediated immunity                            |
| GO:0031988 | 5.19E-05                | 331              | 3486          | membrane-bounded vesicle                               |
| GO:0002366 | 5.47E-05                | 33               | 205           | leukocyte activation involved in immune response       |
| GO:0002694 | 5.84E-05                | 59               | 428           | regulation of leukocyte activation                     |
| GO:0002279 | 5.89E-05                | 12               | 41            | mast cell activation involved in immune response       |
| GO:0043303 | 5.89E-05                | 12               | 41            | mast cell degranulation                                |
| GO:0016773 | 6.07E-05                | 107              | 698           | phosphotransferase activity, alcohol group as acceptor |
| GO:0002697 | 6.13E-05                | 53               | 411           | regulation of immune effector process                  |
| GO:0044424 | 6.15E-05                | 1093             | 13248         | intracellular part                                     |
| GO:0002263 | 6.45E-05                | 33               | 207           | cell activation involved in immune response            |
| GO:0009617 | 6.68E-05                | 59               | 524           | response to bacterium                                  |
| GO:0005622 | 7.11E-05                | 1114             | 13564         | intracellular                                          |

|            |          |     |       |                                                                    |
|------------|----------|-----|-------|--------------------------------------------------------------------|
| GO:0018193 | 7.18E-05 | 159 | 1331  | peptidyl-amino acid modification                                   |
| GO:0016301 | 7.66E-05 | 113 | 766   | kinase activity                                                    |
| GO:0002764 | 7.90E-05 | 88  | 628   | immune response-regulating signaling pathway                       |
| GO:0016772 | 8.93E-05 | 124 | 908   | transferase activity, transferring phosphorus-containing groups    |
| GO:0033006 | 9.30E-05 | 9   | 26    | regulation of mast cell activation involved in immune response     |
| GO:0043304 | 9.30E-05 | 9   | 26    | regulation of mast cell degranulation                              |
| GO:0002250 | 9.46E-05 | 42  | 342   | adaptive immune response                                           |
| GO:0098602 | 9.47E-05 | 103 | 757   | single organism cell adhesion                                      |
| GO:0002429 | 9.65E-05 | 50  | 310   | immune response-activating cell surface receptor signaling pathway |
| GO:0031267 | 1.06E-04 | 47  | 244   | small GTPase binding                                               |
| GO:0051704 | 1.07E-04 | 220 | 2369  | multi-organism process                                             |
| GO:0016032 | 1.20E-04 | 90  | 786   | viral process                                                      |
| GO:0017016 | 1.26E-04 | 44  | 226   | Ras GTPase binding                                                 |
| GO:0004672 | 1.28E-04 | 93  | 591   | protein kinase activity                                            |
| GO:0042060 | 1.35E-04 | 100 | 734   | wound healing                                                      |
| GO:0032765 | 1.45E-04 | 3   | 3     | positive regulation of mast cell cytokine production               |
| GO:0002275 | 1.48E-04 | 16  | 66    | myeloid cell activation involved in immune response                |
| GO:0071216 | 1.53E-04 | 29  | 178   | cellular response to biotic stimulus                               |
| GO:0005829 | 1.54E-04 | 340 | 3255  | cytosol                                                            |
| GO:0032269 | 1.55E-04 | 122 | 1030  | negative regulation of cellular protein metabolic process          |
| GO:0002886 | 1.56E-04 | 11  | 35    | regulation of myeloid leukocyte mediated immunity                  |
| GO:0051020 | 1.64E-04 | 49  | 266   | GTPase binding                                                     |
| GO:0051248 | 1.67E-04 | 129 | 1098  | negative regulation of protein metabolic process                   |
| GO:0032268 | 1.70E-04 | 254 | 2412  | regulation of cellular protein metabolic process                   |
| GO:0044403 | 1.71E-04 | 92  | 825   | symbiosis, encompassing mutualism through parasitism               |
| GO:0044419 | 1.71E-04 | 92  | 825   | interspecies interaction between organisms                         |
| GO:0002819 | 1.76E-04 | 20  | 120   | regulation of adaptive immune response                             |
| GO:0018105 | 1.77E-04 | 44  | 244   | peptidyl-serine phosphorylation                                    |
| GO:0002703 | 1.87E-04 | 24  | 149   | regulation of leukocyte mediated immunity                          |
| GO:0043300 | 1.88E-04 | 11  | 35    | regulation of leukocyte degranulation                              |
| GO:0032763 | 1.99E-04 | 4   | 5     | regulation of mast cell cytokine production                        |
| GO:0051246 | 2.05E-04 | 270 | 2585  | regulation of protein metabolic process                            |
| GO:0042119 | 2.08E-04 | 9   | 25    | neutrophil activation                                              |
| GO:0016310 | 2.11E-04 | 238 | 2136  | phosphorylation                                                    |
| GO:0000166 | 2.14E-04 | 249 | 2286  | nucleotide binding                                                 |
| GO:0044764 | 2.16E-04 | 90  | 800   | multi-organism cellular process                                    |
| GO:1901265 | 2.19E-04 | 249 | 2287  | nucleoside phosphate binding                                       |
| GO:0036094 | 2.31E-04 | 273 | 2592  | small molecule binding                                             |
| GO:0042742 | 2.42E-04 | 24  | 223   | defense response to bacterium                                      |
| GO:0002460 | 2.52E-04 | 29  | 213   | adaptive immune response                                           |
| GO:0034110 | 2.87E-04 | 44  | 303   | regulation of homotypic cell-cell adhesion                         |
| GO:0031347 | 2.97E-04 | 86  | 781   | regulation of defense response                                     |
| GO:0002699 | 2.99E-04 | 23  | 151   | positive regulation of immune effector process                     |
| GO:0044428 | 3.22E-04 | 354 | 3721  | nuclear part                                                       |
| GO:0006909 | 3.40E-04 | 37  | 205   | phagocytosis                                                       |
| GO:0048518 | 3.46E-04 | 543 | 5390  | positive regulation of biological process                          |
| GO:0002431 | 3.69E-04 | 21  | 79    | Fc receptor mediated stimulatory signaling pathway                 |
| GO:0050817 | 3.88E-04 | 77  | 566   | coagulation                                                        |
| GO:0002521 | 4.15E-04 | 63  | 460   | leukocyte differentiation                                          |
| GO:0036230 | 4.26E-04 | 9   | 29    | granulocyte activation                                             |
| GO:0071869 | 4.39E-04 | 13  | 33    | response to catecholamine                                          |
| GO:0007599 | 4.54E-04 | 77  | 566   | hemostasis                                                         |
| GO:0043227 | 4.90E-04 | 951 | 11577 | membrane-bounded organelle                                         |
| GO:0009892 | 4.91E-04 | 273 | 2666  | negative regulation of metabolic process                           |
| GO:0031981 | 5.06E-04 | 321 | 3371  | nuclear lumen                                                      |
| GO:0018209 | 5.12E-04 | 44  | 258   | peptidyl-serine modification                                       |
| GO:0032553 | 5.34E-04 | 208 | 1836  | ribonucleotide binding                                             |
| GO:0007596 | 5.40E-04 | 76  | 561   | blood coagulation                                                  |
| GO:0071867 | 5.70E-04 | 13  | 35    | response to monoamine                                              |
| GO:0035639 | 5.92E-04 | 201 | 1778  | purine ribonucleoside triphosphate binding                         |
| GO:0032549 | 5.96E-04 | 202 | 1791  | ribonucleoside binding                                             |
| GO:0045184 | 5.99E-04 | 202 | 1953  | establishment of protein localization                              |
| GO:0007049 | 6.06E-04 | 186 | 1762  | cell cycle                                                         |

|            |          |     |      |                                                                                   |
|------------|----------|-----|------|-----------------------------------------------------------------------------------|
| GO:0009615 | 6.09E-04 | 47  | 407  | response to virus                                                                 |
| GO:0044267 | 6.13E-04 | 456 | 4950 | cellular protein metabolic process                                                |
| GO:0032555 | 6.16E-04 | 206 | 1820 | purine ribonucleotide binding                                                     |
| GO:0046631 | 6.19E-04 | 22  | 111  | alpha-beta T cell activation                                                      |
| GO:0005773 | 6.51E-04 | 73  | 599  | vacuole                                                                           |
| GO:0045088 | 6.51E-04 | 50  | 397  | regulation of innate immune response                                              |
| GO:0097367 | 7.04E-04 | 240 | 2192 | carbohydrate derivative binding                                                   |
| GO:0006464 | 7.05E-04 | 380 | 3831 | cellular protein modification process                                             |
| GO:0036211 | 7.05E-04 | 380 | 3831 | protein modification process                                                      |
| GO:0001882 | 7.13E-04 | 202 | 1798 | nucleoside binding                                                                |
| GO:0046634 | 7.19E-04 | 15  | 70   | regulation of alpha-beta T cell activation                                        |
| GO:0017076 | 7.27E-04 | 206 | 1829 | purine nucleotide binding                                                         |
| GO:0016337 | 7.32E-04 | 92  | 709  | single organismal cell-cell adhesion                                              |
| GO:0032550 | 7.34E-04 | 201 | 1788 | purine ribonucleoside binding                                                     |
| GO:0030155 | 7.44E-04 | 86  | 627  | regulation of cell adhesion                                                       |
| GO:0071870 | 7.44E-04 | 12  | 30   | cellular response to catecholamine stimulus                                       |
| GO:0001883 | 7.81E-04 | 201 | 1791 | purine nucleoside binding                                                         |
| GO:0002822 | 8.05E-04 | 17  | 110  | regulation of adaptive immune response                                            |
| GO:0006796 | 8.12E-04 | 309 | 2975 | phosphate-containing compound metabolic process                                   |
| GO:0018107 | 8.44E-04 | 19  | 79   | peptidyl-threonine phosphorylation                                                |
| GO:0071868 | 8.51E-04 | 12  | 31   | cellular response to monoamine stimulus                                           |
| GO:0010605 | 8.63E-04 | 247 | 2396 | negative regulation of macromolecule metabolic process                            |
| GO:0032762 | 8.67E-04 | 4   | 7    | mast cell cytokine production                                                     |
| GO:0071219 | 9.24E-04 | 25  | 160  | cellular response to molecule of bacterial origin                                 |
| GO:0002520 | 9.61E-04 | 100 | 813  | immune system development                                                         |
| GO:0007165 | 9.90E-04 | 523 | 5597 | signal transduction                                                               |
| GO:0070488 | 1.00E-03 | 2   | 2    | neutrophil aggregation                                                            |
| GO:0050896 | 1.03E-03 | 719 | 8210 | response to stimulus                                                              |
| GO:0001772 | 1.03E-03 | 10  | 33   | immunological synapse                                                             |
| GO:0071702 | 1.04E-03 | 249 | 2562 | organic substance transport                                                       |
| GO:0002683 | 1.09E-03 | 48  | 365  | negative regulation of immune system process                                      |
| GO:0001816 | 1.11E-03 | 70  | 633  | cytokine production                                                               |
| GO:0051249 | 1.12E-03 | 48  | 374  | regulation of lymphocyte activation                                               |
| GO:0051716 | 1.13E-03 | 620 | 6898 | cellular response to stimulus                                                     |
| GO:1903037 | 1.13E-03 | 40  | 294  | regulation of leukocyte cell-cell adhesion                                        |
| GO:0032559 | 1.20E-03 | 178 | 1491 | adenyl ribonucleotide binding                                                     |
| GO:0015031 | 1.21E-03 | 183 | 1808 | protein transport                                                                 |
| GO:1903729 | 1.21E-03 | 16  | 73   | regulation of plasma membrane organization                                        |
| GO:0009620 | 1.22E-03 | 9   | 54   | response to fungus                                                                |
| GO:0007264 | 1.22E-03 | 119 | 912  | small GTPase mediated signal transduction                                         |
| GO:0006793 | 1.22E-03 | 312 | 3037 | phosphorus metabolic process                                                      |
| GO:0000323 | 1.23E-03 | 63  | 511  | lytic vacuole                                                                     |
| GO:0005764 | 1.23E-03 | 63  | 511  | lysosome                                                                          |
| GO:0031665 | 1.25E-03 | 4   | 8    | negative regulation of lipopolysaccharide-mediated signaling pathway              |
| GO:0005524 | 1.27E-03 | 173 | 1454 | ATP binding                                                                       |
| GO:0005654 | 1.28E-03 | 272 | 2756 | nucleoplasm                                                                       |
| GO:0002286 | 1.28E-03 | 15  | 86   | T cell activation involved in immune response                                     |
| GO:0010792 | 1.31E-03 | 3   | 4    | DNA double-strand break processing involved in repair via single-strand annealing |
| GO:0071222 | 1.33E-03 | 24  | 153  | cellular response to lipopolysaccharide                                           |
| GO:0002224 | 1.35E-03 | 25  | 153  | toll-like receptor signaling pathway                                              |
| GO:0042326 | 1.36E-03 | 62  | 423  | negative regulation of phosphorylation                                            |
| GO:0030554 | 1.37E-03 | 178 | 1498 | adenyl nucleotide binding                                                         |
| GO:0045335 | 1.38E-03 | 15  | 82   | phagocytic vesicle                                                                |
| GO:0002758 | 1.40E-03 | 39  | 281  | innate immune response-activating signal transduction                             |
| GO:0051607 | 1.48E-03 | 38  | 326  | defense response to virus                                                         |
| GO:0048534 | 1.50E-03 | 95  | 770  | hematopoietic or lymphoid organ development                                       |
| GO:0030097 | 1.53E-03 | 89  | 723  | hemopoiesis                                                                       |
| GO:0050878 | 1.53E-03 | 89  | 715  | regulation of body fluid levels                                                   |
| GO:0006886 | 1.54E-03 | 105 | 991  | intracellular protein transport                                                   |
| GO:0004697 | 1.54E-03 | 8   | 16   | protein kinase C activity                                                         |
| GO:0005634 | 1.54E-03 | 571 | 6628 | nucleus                                                                           |
| GO:0031349 | 1.55E-03 | 50  | 429  | positive regulation of defense response                                           |
| GO:0045089 | 1.56E-03 | 43  | 330  | positive regulation of innate immune response                                     |

|            |          |     |      |                                                                            |
|------------|----------|-----|------|----------------------------------------------------------------------------|
| GO:0045087 | 1.56E-03 | 112 | 1091 | innate immune response                                                     |
| GO:0042581 | 1.59E-03 | 5   | 14   | specific granule                                                           |
| GO:0006974 | 1.65E-03 | 82  | 783  | cellular response to DNA damage stimulus                                   |
| GO:0048476 | 1.66E-03 | 2   | 2    | Holliday junction resolvase complex                                        |
| GO:0007249 | 1.67E-03 | 34  | 259  | I-kappaB kinase/NF-kappaB signaling                                        |
| GO:0050866 | 1.68E-03 | 25  | 160  | negative regulation of cell activation                                     |
| GO:0034112 | 1.69E-03 | 30  | 203  | positive regulation of homotypic cell-cell adhesion                        |
| GO:0018210 | 1.74E-03 | 19  | 83   | peptidyl-threonine modification                                            |
| GO:0010608 | 1.76E-03 | 51  | 436  | posttranscriptional regulation of gene expression                          |
| GO:0061676 | 1.77E-03 | 2   | 2    | importin-alpha family protein binding                                      |
| GO:1990000 | 1.78E-03 | 4   | 6    | amyloid fibril formation                                                   |
| GO:0043412 | 1.78E-03 | 387 | 4002 | macromolecule modification                                                 |
| GO:0002695 | 1.78E-03 | 22  | 141  | negative regulation of leukocyte activation                                |
| GO:0002218 | 1.82E-03 | 39  | 286  | activation of innate immune response                                       |
| GO:0016740 | 1.86E-03 | 220 | 2176 | transferase activity                                                       |
| GO:0050863 | 1.97E-03 | 38  | 284  | regulation of T cell activation                                            |
| GO:0008645 | 2.03E-03 | 24  | 146  | hexose transport                                                           |
| GO:0002283 | 2.05E-03 | 6   | 14   | neutrophil activation involved in immune response                          |
| GO:1903039 | 2.05E-03 | 30  | 205  | positive regulation of leukocyte cell-cell adhesion                        |
| GO:0000798 | 2.10E-03 | 3   | 5    | nuclear cohesin complex                                                    |
| GO:0034991 | 2.10E-03 | 3   | 5    | nuclear meiotic cohesin complex                                            |
| GO:0008643 | 2.19E-03 | 27  | 182  | carbohydrate transport                                                     |
| GO:0052642 | 2.23E-03 | 2   | 2    | lysophosphatidic acid phosphatase activity                                 |
| GO:0009611 | 2.24E-03 | 121 | 1049 | response to wounding                                                       |
| GO:0002768 | 2.28E-03 | 68  | 494  | immune response-regulating cell surface receptor signaling pathway         |
| GO:0030312 | 2.30E-03 | 4   | 10   | external encapsulating structure                                           |
| GO:0032609 | 2.33E-03 | 16  | 104  | interferon-gamma production                                                |
| GO:0006302 | 2.37E-03 | 28  | 219  | double-strand break repair                                                 |
| GO:0080134 | 2.39E-03 | 148 | 1434 | regulation of response to stress                                           |
| GO:0000726 | 2.41E-03 | 13  | 69   | non-recombinational repair                                                 |
| GO:0015749 | 2.51E-03 | 24  | 148  | monosaccharide transport                                                   |
| GO:0050851 | 2.52E-03 | 31  | 201  | antigen receptor-mediated signaling pathway                                |
| GO:0051250 | 2.52E-03 | 19  | 121  | negative regulation of lymphocyte activation                               |
| GO:0034142 | 2.53E-03 | 20  | 115  | toll-like receptor 4 signaling pathway                                     |
| GO:0050867 | 2.60E-03 | 38  | 286  | positive regulation of cell activation                                     |
| GO:0002702 | 2.71E-03 | 11  | 65   | positive regulation of production of molecular mediator of immune response |
| GO:0019003 | 2.74E-03 | 10  | 53   | GDP binding                                                                |
| GO:0043168 | 2.74E-03 | 274 | 2601 | anion binding                                                              |
| GO:0032943 | 2.87E-03 | 32  | 259  | mononuclear cell proliferation                                             |
| GO:0002821 | 2.88E-03 | 12  | 73   | positive regulation of adaptive immune response                            |
| GO:0012501 | 3.00E-03 | 197 | 1853 | programmed cell death                                                      |
| GO:0070661 | 3.01E-03 | 33  | 271  | leukocyte proliferation                                                    |
| GO:0050832 | 3.01E-03 | 7   | 40   | defense response to fungus                                                 |
| GO:0051258 | 3.04E-03 | 36  | 224  | protein polymerization                                                     |
| GO:0030217 | 3.05E-03 | 32  | 210  | T cell differentiation                                                     |
| GO:0042098 | 3.05E-03 | 24  | 174  | T cell proliferation                                                       |
| GO:0032439 | 3.05E-03 | 3   | 3    | endosome localization                                                      |
| GO:0045002 | 3.05E-03 | 3   | 5    | double-strand break repair via single-strand annealing                     |
| GO:0048519 | 3.09E-03 | 444 | 4547 | negative regulation of biological process                                  |
| GO:0043086 | 3.13E-03 | 92  | 846  | negative regulation of catalytic activity                                  |
| GO:0002696 | 3.14E-03 | 37  | 278  | positive regulation of leukocyte activation                                |
| GO:0032970 | 3.14E-03 | 49  | 306  | regulation of actin filament-based process                                 |
| GO:0008104 | 3.18E-03 | 242 | 2381 | protein localization                                                       |
| GO:0008064 | 3.22E-03 | 27  | 155  | regulation of actin polymerization or depolymerization                     |
| GO:0032947 | 3.22E-03 | 17  | 67   | protein complex scaffold                                                   |
| GO:0055037 | 3.24E-03 | 22  | 128  | recycling endosome                                                         |
| GO:0002237 | 3.33E-03 | 40  | 333  | response to molecule of bacterial origin                                   |
| GO:0060759 | 3.33E-03 | 20  | 142  | regulation of response to cytokine stimulus                                |
| GO:0033005 | 3.36E-03 | 5   | 15   | positive regulation of mast cell activation                                |
| GO:0043560 | 3.42E-03 | 6   | 11   | insulin receptor substrate binding                                         |
| GO:0031625 | 3.43E-03 | 37  | 254  | ubiquitin protein ligase binding                                           |
| GO:0007154 | 3.45E-03 | 569 | 6140 | cell communication                                                         |
| GO:0005085 | 3.52E-03 | 40  | 198  | guanyl-nucleotide exchange factor activity                                 |

|            |          |     |       |                                                                |
|------------|----------|-----|-------|----------------------------------------------------------------|
| GO:0030098 | 3.57E-03 | 41  | 307   | lymphocyte differentiation                                     |
| GO:0045121 | 3.62E-03 | 46  | 287   | membrane raft                                                  |
| GO:0030832 | 3.64E-03 | 27  | 156   | regulation of actin filament length                            |
| GO:0002221 | 3.65E-03 | 27  | 187   | pattern recognition receptor signaling pathway                 |
| GO:0043484 | 3.67E-03 | 16  | 90    | regulation of RNA splicing                                     |
| GO:0022407 | 3.71E-03 | 49  | 379   | regulation of cell-cell adhesion                               |
| GO:0098857 | 3.71E-03 | 46  | 288   | membrane microdomain                                           |
| GO:0015758 | 3.72E-03 | 23  | 144   | glucose transport                                              |
| GO:0006468 | 3.72E-03 | 198 | 1802  | protein phosphorylation                                        |
| GO:0030833 | 3.75E-03 | 24  | 137   | regulation of actin filament polymerization                    |
| GO:0033293 | 3.77E-03 | 11  | 55    | monocarboxylic acid binding                                    |
| GO:0022406 | 3.88E-03 | 14  | 67    | membrane docking                                               |
| GO:0042832 | 3.91E-03 | 5   | 18    | defense response to protozoan                                  |
| GO:0038094 | 3.94E-03 | 18  | 77    | Fc-gamma receptor signaling pathway                            |
| GO:0004905 | 3.95E-03 | 2   | 2     | type I interferon receptor activity                            |
| GO:0019962 | 3.95E-03 | 2   | 2     | type I interferon binding                                      |
| GO:0009605 | 3.98E-03 | 249 | 2478  | response to external stimulus                                  |
| GO:0006915 | 4.02E-03 | 194 | 1834  | apoptotic process                                              |
| GO:0044389 | 4.07E-03 | 37  | 258   | ubiquitin-like protein ligase binding                          |
| GO:0070663 | 4.13E-03 | 27  | 202   | regulation of leukocyte proliferation                          |
| GO:0045159 | 4.14E-03 | 3   | 5     | myosin II binding                                              |
| GO:0046651 | 4.14E-03 | 31  | 256   | lymphocyte proliferation                                       |
| GO:0043231 | 4.26E-03 | 856 | 10449 | intracellular membrane-bounded organelle                       |
| GO:0019902 | 4.29E-03 | 29  | 161   | phosphatase binding                                            |
| GO:0016604 | 4.30E-03 | 44  | 344   | nuclear body                                                   |
| GO:0010563 | 4.32E-03 | 73  | 544   | negative regulation of phosphorus metabolic process            |
| GO:0045936 | 4.32E-03 | 73  | 544   | negative regulation of phosphate metabolic process             |
| GO:0043254 | 4.34E-03 | 48  | 353   | regulation of protein complex assembly                         |
| GO:0001913 | 4.36E-03 | 7   | 30    | T cell mediated cytotoxicity                                   |
| GO:0031400 | 4.38E-03 | 81  | 634   | negative regulation of protein modification process            |
| GO:0005885 | 4.55E-03 | 4   | 11    | Arp2/3 protein complex                                         |
| GO:0044444 | 4.64E-03 | 682 | 7802  | cytoplasmic part                                               |
| GO:0042113 | 4.64E-03 | 29  | 218   | B cell activation                                              |
| GO:0023052 | 4.65E-03 | 563 | 6064  | signaling                                                      |
| GO:0000724 | 4.66E-03 | 19  | 148   | double-strand break repair via homologous recombination        |
| GO:0000725 | 4.66E-03 | 19  | 148   | recombinational repair                                         |
| GO:0044093 | 4.69E-03 | 206 | 1784  | positive regulation of molecular function                      |
| GO:0001959 | 4.70E-03 | 19  | 136   | regulation of cytokine-mediated signaling pathway              |
| GO:0035662 | 4.75E-03 | 2   | 3     | Toll-like receptor 4 binding                                   |
| GO:0048013 | 4.80E-03 | 21  | 95    | ephrin receptor signaling pathway                              |
| GO:0050870 | 4.83E-03 | 28  | 199   | positive regulation of T cell activation                       |
| GO:0016888 | 4.84E-03 | 4   | 12    | endodeoxyribonuclease activity, producing 5'-phosphomonoesters |
| GO:0050544 | 4.89E-03 | 3   | 5     | arachidonic acid binding                                       |
| GO:0002824 | 4.90E-03 | 11  | 69    | positive regulation of adaptive immune response                |
| GO:0032271 | 4.92E-03 | 29  | 172   | regulation of protein polymerization                           |
| GO:0048522 | 5.04E-03 | 460 | 4635  | positive regulation of cellular process                        |
| GO:0044822 | 5.25E-03 | 104 | 1156  | poly(A) RNA binding                                            |
| GO:0050789 | 5.27E-03 | 889 | 10521 | regulation of biological process                               |
| GO:0010543 | 5.28E-03 | 9   | 32    | regulation of platelet activation                              |
| GO:0043312 | 5.30E-03 | 5   | 11    | neutrophil degranulation                                       |
| GO:0044421 | 5.35E-03 | 314 | 3693  | extracellular region part                                      |
| GO:0065009 | 5.43E-03 | 294 | 2787  | regulation of molecular function                               |
| GO:0002456 | 5.43E-03 | 13  | 77    | T cell mediated immunity                                       |
| GO:0030893 | 5.44E-03 | 3   | 7     | meiotic cohesin complex                                        |
| GO:0001817 | 5.45E-03 | 60  | 570   | regulation of cytokine production                              |
| GO:0046635 | 5.46E-03 | 11  | 51    | positive regulation of alpha-beta T cell activation            |
| GO:0002440 | 5.47E-03 | 19  | 151   | production of molecular mediator of immune response            |
| GO:0051247 | 5.51E-03 | 164 | 1556  | positive regulation of protein metabolic process               |
| GO:0017137 | 5.51E-03 | 18  | 89    | Rab GTPase binding                                             |
| GO:0030029 | 5.53E-03 | 92  | 622   | actin filament-based process                                   |
| GO:0044700 | 5.53E-03 | 561 | 6058  | single organism signaling                                      |
| GO:0090330 | 5.53E-03 | 7   | 17    | regulation of platelet aggregation                             |
| GO:0009057 | 5.58E-03 | 113 | 1149  | macromolecule catabolic process                                |

|            |          |     |      |                                                                                             |
|------------|----------|-----|------|---------------------------------------------------------------------------------------------|
| GO:0044092 | 5.60E-03 | 115 | 1096 | negative regulation of molecular function                                                   |
| GO:0032944 | 5.65E-03 | 26  | 195  | regulation of mononuclear cell proliferation                                                |
| GO:0031054 | 5.70E-03 | 4   | 14   | pre-miRNA processing                                                                        |
| GO:0070820 | 5.72E-03 | 3   | 6    | tertiary granule                                                                            |
| GO:0030866 | 5.72E-03 | 8   | 28   | cortical actin cytoskeleton organization                                                    |
| GO:0002573 | 5.73E-03 | 30  | 190  | myeloid leukocyte differentiation                                                           |
| GO:0048583 | 5.77E-03 | 364 | 3626 | regulation of response to stimulus                                                          |
| GO:0071638 | 5.80E-03 | 2   | 3    | negative regulation of monocyte chemotactic protein-1 production                            |
| GO:0051015 | 5.90E-03 | 26  | 116  | actin filament binding                                                                      |
| GO:0044351 | 5.92E-03 | 4   | 7    | macropinocytosis                                                                            |
| GO:0002832 | 6.03E-03 | 7   | 28   | negative regulation of response to biotic stimulus                                          |
| GO:0032956 | 6.10E-03 | 42  | 271  | regulation of actin cytoskeleton organization                                               |
| GO:0043901 | 6.15E-03 | 20  | 153  | negative regulation of multi-organism process                                               |
| GO:0019900 | 6.16E-03 | 82  | 596  | kinase binding                                                                              |
| GO:0035259 | 6.20E-03 | 5   | 13   | glucocorticoid receptor binding                                                             |
| GO:1902743 | 6.21E-03 | 11  | 37   | regulation of lamellipodium organization                                                    |
| GO:0050794 | 6.26E-03 | 850 | 9980 | regulation of cellular process                                                              |
| GO:1903012 | 6.33E-03 | 3   | 6    | positive regulation of bone development                                                     |
| GO:0043085 | 6.43E-03 | 177 | 1523 | positive regulation of catalytic activity                                                   |
| GO:0017048 | 6.50E-03 | 18  | 84   | Rho GTPase binding                                                                          |
| GO:0019901 | 6.51E-03 | 75  | 531  | protein kinase binding                                                                      |
| GO:0001933 | 6.51E-03 | 54  | 386  | negative regulation of protein phosphorylation                                              |
| GO:1903708 | 6.66E-03 | 24  | 162  | positive regulation of hemopoiesis                                                          |
| GO:0032088 | 6.69E-03 | 12  | 66   | negative regulation of NF-kappaB transcription factor activity                              |
| GO:0001767 | 6.70E-03 | 4   | 8    | establishment of lymphocyte polarity                                                        |
| GO:0031324 | 6.76E-03 | 235 | 2362 | negative regulation of cellular metabolic process                                           |
| GO:0050542 | 6.82E-03 | 3   | 6    | icosanoid binding                                                                           |
| GO:1901567 | 6.82E-03 | 3   | 6    | fatty acid derivative binding                                                               |
| GO:0050900 | 6.93E-03 | 40  | 352  | leukocyte migration                                                                         |
| GO:0006837 | 6.95E-03 | 5   | 17   | serotonin transport                                                                         |
| GO:1902563 | 7.02E-03 | 4   | 6    | regulation of neutrophil activation                                                         |
| GO:0002449 | 7.06E-03 | 24  | 212  | lymphocyte mediated immunity                                                                |
| GO:0051128 | 7.10E-03 | 238 | 2149 | regulation of cellular component organization                                               |
| GO:1900034 | 7.15E-03 | 14  | 75   | regulation of cellular response to heat                                                     |
| GO:0031334 | 7.23E-03 | 28  | 197  | positive regulation of protein complex assembly                                             |
| GO:0005504 | 7.25E-03 | 6   | 28   | fatty acid binding                                                                          |
| GO:0002433 | 7.45E-03 | 17  | 73   | immune response-regulating cell surface receptor signaling pathway involved in phagocytosis |
| GO:0038096 | 7.45E-03 | 17  | 73   | Fc-gamma receptor signaling pathway involved in phagocytosis                                |
| GO:0050543 | 7.50E-03 | 3   | 6    | icosatetraenoic acid binding                                                                |
| GO:0032270 | 7.58E-03 | 154 | 1461 | positive regulation of cellular protein metabolic process                                   |
| GO:0050777 | 7.73E-03 | 17  | 118  | negative regulation of immune response                                                      |
| GO:0010828 | 7.80E-03 | 10  | 43   | positive regulation of glucose transport                                                    |
| GO:0050790 | 7.85E-03 | 245 | 2315 | regulation of catalytic activity                                                            |
| GO:0009893 | 7.87E-03 | 366 | 3565 | positive regulation of metabolic process                                                    |
| GO:0008219 | 7.94E-03 | 202 | 1957 | cell death                                                                                  |
| GO:0016265 | 7.94E-03 | 202 | 1957 | death                                                                                       |
| GO:0044445 | 7.94E-03 | 20  | 211  | cytosolic part                                                                              |
| GO:0051234 | 7.99E-03 | 424 | 4531 | establishment of localization                                                               |
| GO:1990923 | 7.99E-03 | 2   | 3    | PET complex                                                                                 |
| GO:0006622 | 8.08E-03 | 5   | 15   | protein targeting to lysosome                                                               |
| GO:0046627 | 8.18E-03 | 9   | 31   | negative regulation of insulin receptor signaling pathway                                   |
| GO:0019538 | 8.23E-03 | 486 | 5514 | protein metabolic process                                                                   |
| GO:0001562 | 8.24E-03 | 5   | 21   | response to protozoan                                                                       |
| GO:2001204 | 8.25E-03 | 3   | 7    | regulation of osteoclast development                                                        |
| GO:0006897 | 8.29E-03 | 76  | 598  | endocytosis                                                                                 |
| GO:0034121 | 8.33E-03 | 9   | 40   | regulation of toll-like receptor signaling pathway                                          |
| GO:0031399 | 8.38E-03 | 189 | 1768 | regulation of protein modification process                                                  |
| GO:0008360 | 8.44E-03 | 24  | 128  | regulation of cell shape                                                                    |
| GO:0061081 | 8.44E-03 | 4   | 12   | positive regulation of myeloid leukocyte cytokine production involved in immune response    |
| GO:0030218 | 8.46E-03 | 17  | 96   | erythrocyte differentiation                                                                 |
| GO:0097190 | 8.46E-03 | 74  | 630  | apoptotic signaling pathway                                                                 |
| GO:0032649 | 8.52E-03 | 13  | 93   | regulation of interferon-gamma production                                                   |
| GO:0071986 | 8.54E-03 | 2   | 6    | Regulator complex                                                                           |

|            |          |     |       |                                                              |
|------------|----------|-----|-------|--------------------------------------------------------------|
| GO:0044265 | 8.64E-03 | 89  | 917   | cellular macromolecule catabolic process                     |
| GO:0050670 | 8.73E-03 | 25  | 193   | regulation of lymphocyte proliferation                       |
| GO:0090234 | 8.87E-03 | 2   | 2     | regulation of kinetochore assembly                           |
| GO:0006469 | 8.88E-03 | 34  | 234   | negative regulation of protein kinase activity               |
| GO:1902580 | 8.88E-03 | 130 | 1246  | single-organism cellular localization                        |
| GO:0030838 | 8.99E-03 | 16  | 88    | positive regulation of actin filament polymerization         |
| GO:0006810 | 9.01E-03 | 409 | 4399  | transport                                                    |
| GO:0003729 | 9.12E-03 | 20  | 150   | mRNA binding                                                 |
| GO:0050852 | 9.26E-03 | 24  | 163   | T cell receptor signaling pathway                            |
| GO:0044446 | 9.29E-03 | 654 | 7742  | intracellular organelle part                                 |
| GO:0071871 | 9.31E-03 | 7   | 16    | response to epinephrine                                      |
| GO:0019961 | 9.32E-03 | 2   | 3     | interferon binding                                           |
| GO:0002285 | 9.42E-03 | 19  | 145   | lymphocyte activation involved in immune response            |
| GO:0051251 | 9.53E-03 | 33  | 254   | positive regulation of lymphocyte activation                 |
| GO:0065007 | 9.58E-03 | 923 | 11019 | biological regulation                                        |
| GO:0005527 | 9.58E-03 | 5   | 18    | macrolide binding                                            |
| GO:0005528 | 9.58E-03 | 5   | 18    | FK506 binding                                                |
| GO:0050786 | 9.66E-03 | 3   | 11    | RAGE receptor binding                                        |
| GO:0030036 | 9.72E-03 | 80  | 542   | actin cytoskeleton organization                              |
| GO:0070664 | 9.72E-03 | 12  | 68    | negative regulation of leukocyte proliferation               |
| GO:1900077 | 9.73E-03 | 9   | 33    | negative regulation of cellular response to insulin stimulus |
| GO:0045730 | 9.75E-03 | 6   | 27    | respiratory burst                                            |
| GO:0032184 | 9.76E-03 | 3   | 6     | SUMO polymer binding                                         |
| GO:0042102 | 9.78E-03 | 13  | 92    | positive regulation of T cell proliferation                  |
| GO:1902105 | 9.81E-03 | 32  | 235   | regulation of leukocyte differentiation                      |
| GO:0042325 | 9.93E-03 | 159 | 1473  | regulation of phosphorylation                                |
| GO:0034350 | 9.96E-03 | 4   | 7     | regulation of glial cell apoptotic process                   |
| GO:0034351 | 9.96E-03 | 4   | 7     | negative regulation of glial cell apoptotic process          |
| GO:0002698 | 9.97E-03 | 15  | 100   | negative regulation of immune effector process               |
