# Supplementary material for: Variations in 5-methylcytosine and 5-hydroxymethylcytosine among human brain, blood, and saliva using oxBS and the Infinium MethylationEPIC array
Source: PubMed Central journal article supplement — Biol Methods Protoc. 2016 Dec 27;1(1):1–8. doi: 10.1093/biomethods/bpw002 (PMC7164292; doi:10.1093/biomethods/bpw002), 2016-12-27
Supplement: supplementary_table_s2.pdf [file supplementary_table_s2.pdf]

**Supplementary Table S2: Significant GO terms ( $p < 0.01$ ) related to the 5hmC-containing probes in DNase Hypersensitivity Sites**

Category = Gene ontology category

Over\_represented pvalue = p-value of the overrepresented gene ontology term

Number DE In Cat = The number of differentially expressed genes in the gene ontology category

Number In Cat = The total number of genes in the gene ontology category

GO term = Specific gene ontology term in the category

| Category   | over_represented pvalue | number DE In Cat | number In Cat | GO term                                               |
|------------|-------------------------|------------------|---------------|-------------------------------------------------------|
| GO:0071944 | 1.20E-24                | 4043             | 4406          | cell periphery                                        |
| GO:0005886 | 9.09E-24                | 3949             | 4305          | plasma membrane                                       |
| GO:0044459 | 1.33E-21                | 2224             | 2386          | plasma membrane part                                  |
| GO:0044699 | 2.30E-17                | 11084            | 12517         | single-organism process                               |
| GO:0007154 | 3.40E-17                | 5129             | 5658          | cell communication                                    |
| GO:0044700 | 3.57E-17                | 5060             | 5579          | single organism signaling                             |
| GO:0023052 | 4.34E-17                | 5065             | 5585          | signaling                                             |
| GO:0050896 | 4.85E-17                | 6843             | 7625          | response to stimulus                                  |
| GO:0044763 | 3.03E-16                | 10161            | 11448         | single-organism cellular process                      |
| GO:0051179 | 2.66E-15                | 4916             | 5440          | localization                                          |
| GO:0032879 | 3.25E-15                | 2162             | 2336          | regulation of localization                            |
| GO:0007165 | 6.55E-15                | 4640             | 5122          | signal transduction                                   |
| GO:0031226 | 3.19E-14                | 1390             | 1494          | intrinsic component of plasma membrane                |
| GO:0042995 | 5.00E-14                | 1647             | 1765          | cell projection                                       |
| GO:0051716 | 9.47E-14                | 5741             | 6387          | cellular response to stimulus                         |
| GO:0005887 | 1.73E-13                | 1335             | 1436          | integral component of plasma membrane                 |
| GO:0010646 | 8.41E-13                | 2675             | 2913          | regulation of cell communication                      |
| GO:0023051 | 1.04E-12                | 2660             | 2897          | regulation of signaling                               |
| GO:0051234 | 1.81E-12                | 4012             | 4444          | establishment of localization                         |
| GO:0044707 | 2.02E-12                | 5283             | 5858          | single-multicellular organism process                 |
| GO:0006810 | 2.55E-12                | 3894             | 4313          | transport                                             |
| GO:0048583 | 3.56E-12                | 3220             | 3537          | regulation of response to stimulus                    |
| GO:0016020 | 8.89E-12                | 7202             | 8103          | membrane                                              |
| GO:0051049 | 1.09E-11                | 1585             | 1714          | regulation of transport                               |
| GO:0032501 | 1.93E-11                | 5751             | 6407          | multicellular organismal process                      |
| GO:0065008 | 2.87E-11                | 3141             | 3459          | regulation of biological quality                      |
| GO:0043168 | 3.66E-11                | 2336             | 2556          | anion binding                                         |
| GO:0097458 | 4.02E-11                | 1174             | 1252          | neuron part                                           |
| GO:1902578 | 4.45E-11                | 3571             | 3955          | single-organism localization                          |
| GO:0009966 | 6.89E-11                | 2340             | 2551          | regulation of signal transduction                     |
| GO:0012505 | 7.87E-11                | 3240             | 3583          | endomembrane system                                   |
| GO:0003824 | 1.63E-10                | 4739             | 5300          | catalytic activity                                    |
| GO:0044425 | 1.86E-10                | 5187             | 5820          | membrane part                                         |
| GO:0044765 | 2.17E-10                | 3414             | 3784          | single-organism transport                             |
| GO:0007166 | 2.21E-10                | 2477             | 2710          | cell surface receptor signaling pathway               |
| GO:0048518 | 2.50E-10                | 4754             | 5276          | positive regulation of biological process             |
| GO:0009611 | 2.53E-10                | 949              | 1014          | response to wounding                                  |
| GO:0035556 | 3.10E-10                | 2333             | 2553          | intracellular signal transduction                     |
| GO:0005737 | 4.73E-10                | 8902             | 10054         | cytoplasm                                             |
| GO:0048856 | 6.07E-10                | 4524             | 5012          | anatomical structure development                      |
| GO:0044767 | 1.28E-09                | 4980             | 5535          | single-organism developmental process                 |
| GO:0006468 | 1.37E-09                | 1621             | 1760          | protein phosphorylation                               |
| GO:0032559 | 1.41E-09                | 1358             | 1468          | adenyl ribonucleotide binding                         |
| GO:0098805 | 1.42E-09                | 1797             | 1959          | whole membrane                                        |
| GO:0097367 | 1.55E-09                | 1968             | 2153          | carbohydrate derivative binding                       |
| GO:0030554 | 1.60E-09                | 1364             | 1475          | adenyl nucleotide binding                             |
| GO:0032502 | 1.66E-09                | 5050             | 5616          | developmental process                                 |
| GO:0016773 | 1.73E-09                | 658              | 693           | phosphotransferase activity alcohol group as acceptor |
| GO:0016192 | 1.91E-09                | 1221             | 1319          | vesicle-mediated transport                            |
| GO:0007275 | 1.96E-09                | 4324             | 4790          | multicellular organism development                    |

|            |          |      |      |                                                                |
|------------|----------|------|------|----------------------------------------------------------------|
| GO:0016301 | 2.54E-09 | 714  | 755  | kinase activity                                                |
| GO:0051239 | 2.74E-09 | 2297 | 2513 | regulation of multicellular organismal process                 |
| GO:0004672 | 2.81E-09 | 562  | 589  | protein kinase activity                                        |
| GO:0006464 | 4.22E-09 | 3373 | 3739 | cellular protein modification process                          |
| GO:0036211 | 4.22E-09 | 3373 | 3739 | protein modification process                                   |
| GO:0005524 | 4.49E-09 | 1324 | 1433 | ATP binding                                                    |
| GO:0098590 | 5.79E-09 | 859  | 917  | plasma membrane region                                         |
| GO:0042060 | 1.05E-08 | 674  | 715  | wound healing                                                  |
| GO:0001775 | 1.06E-08 | 853  | 916  | cell activation                                                |
| GO:0031224 | 1.11E-08 | 4240 | 4765 | intrinsic component of membrane                                |
| GO:0048522 | 1.14E-08 | 4095 | 4544 | positive regulation of cellular process                        |
| GO:0065009 | 1.52E-08 | 2471 | 2718 | regulation of molecular function                               |
| GO:0098589 | 1.61E-08 | 1039 | 1117 | membrane region                                                |
| GO:0030054 | 1.88E-08 | 1052 | 1128 | cell junction                                                  |
| GO:1902531 | 2.17E-08 | 1467 | 1596 | regulation of intracellular signal transduction                |
| GO:0005215 | 2.41E-08 | 1104 | 1201 | transporter activity                                           |
| GO:0048731 | 2.53E-08 | 3847 | 4257 | system development                                             |
| GO:0030029 | 3.19E-08 | 585  | 616  | actin filament-based process                                   |
| GO:0098797 | 3.51E-08 | 465  | 488  | plasma membrane protein complex                                |
| GO:0048584 | 3.54E-08 | 1796 | 1968 | positive regulation of response to stimulus                    |
| GO:0007155 | 3.63E-08 | 1277 | 1385 | cell adhesion                                                  |
| GO:0072358 | 4.20E-08 | 897  | 960  | cardiovascular system development                              |
| GO:0072359 | 4.20E-08 | 897  | 960  | circulatory system development                                 |
| GO:0016023 | 4.22E-08 | 1007 | 1090 | cytoplasmic membrane-bounded vesicle                           |
| GO:0044444 | 6.27E-08 | 6779 | 7643 | cytoplasmic part                                               |
| GO:0005102 | 6.37E-08 | 1255 | 1368 | receptor binding                                               |
| GO:0043005 | 6.49E-08 | 877  | 937  | neuron projection                                              |
| GO:0016772 | 6.50E-08 | 837  | 897  | transferase activity transferring phosphorus-containing groups |
| GO:0030001 | 6.73E-08 | 733  | 785  | metal ion transport                                            |
| GO:0003779 | 6.77E-08 | 369  | 383  | actin binding                                                  |
| GO:0006897 | 7.22E-08 | 558  | 591  | endocytosis                                                    |
| GO:0022610 | 7.49E-08 | 1280 | 1390 | biological adhesion                                            |
| GO:0023014 | 7.71E-08 | 808  | 867  | signal transduction by protein phosphorylation                 |
| GO:0031410 | 7.81E-08 | 1099 | 1194 | cytoplasmic vesicle                                            |
| GO:0002376 | 7.86E-08 | 2231 | 2470 | immune system process                                          |
| GO:0031982 | 8.22E-08 | 3152 | 3515 | vesicle                                                        |
| GO:0006793 | 8.45E-08 | 2679 | 2962 | phosphorus metabolic process                                   |
| GO:0005615 | 8.87E-08 | 1115 | 1227 | extracellular space                                            |
| GO:0006796 | 8.89E-08 | 2627 | 2903 | phosphate-containing compound metabolic process                |
| GO:0006950 | 9.15E-08 | 3418 | 3812 | response to stress                                             |
| GO:0005576 | 9.26E-08 | 3697 | 4155 | extracellular region                                           |
| GO:0006928 | 9.64E-08 | 1747 | 1905 | movement of cell or subcellular component                      |
| GO:0016021 | 9.67E-08 | 4130 | 4649 | integral component of membrane                                 |
| GO:0005794 | 1.08E-07 | 1258 | 1369 | Golgi apparatus                                                |
| GO:0055085 | 1.45E-07 | 1244 | 1358 | transmembrane transport                                        |
| GO:0031988 | 1.56E-07 | 3041 | 3392 | membrane-bounded vesicle                                       |
| GO:0043412 | 1.79E-07 | 3509 | 3910 | macromolecule modification                                     |
| GO:0046873 | 1.82E-07 | 381  | 399  | metal ion transmembrane transporter activity                   |
| GO:0008092 | 1.83E-07 | 758  | 809  | cytoskeletal protein binding                                   |
| GO:0032553 | 1.89E-07 | 1647 | 1805 | ribonucleotide binding                                         |
| GO:0036094 | 1.94E-07 | 2290 | 2532 | small molecule binding                                         |
| GO:0050790 | 2.30E-07 | 2045 | 2250 | regulation of catalytic activity                               |
| GO:0004674 | 2.35E-07 | 416  | 436  | protein serine/threonine kinase activity                       |
| GO:0022892 | 2.42E-07 | 945  | 1027 | substrate-specific transporter activity                        |
| GO:0048869 | 2.51E-07 | 3510 | 3889 | cellular developmental process                                 |
| GO:0006811 | 2.70E-07 | 1352 | 1480 | ion transport                                                  |
| GO:0046903 | 2.72E-07 | 967  | 1048 | secretion                                                      |
| GO:0044421 | 2.73E-07 | 3177 | 3558 | extracellular region part                                      |
| GO:0050878 | 3.13E-07 | 650  | 695  | regulation of body fluid levels                                |

|            |          |      |      |                                                          |
|------------|----------|------|------|----------------------------------------------------------|
| GO:0005057 | 3.36E-07 | 151  | 152  | receptor signaling protein activity                      |
| GO:0017076 | 3.73E-07 | 1639 | 1798 | purine nucleotide binding                                |
| GO:0032555 | 3.83E-07 | 1631 | 1789 | purine ribonucleotide binding                            |
| GO:0000165 | 3.84E-07 | 779  | 838  | MAPK cascade                                             |
| GO:0051128 | 4.35E-07 | 1936 | 2124 | regulation of cellular component organization            |
| GO:0032940 | 4.57E-07 | 853  | 922  | secretion by cell                                        |
| GO:0044463 | 4.76E-07 | 873  | 939  | cell projection part                                     |
| GO:0048468 | 5.19E-07 | 1967 | 2149 | cell development                                         |
| GO:0001882 | 5.63E-07 | 1611 | 1768 | nucleoside binding                                       |
| GO:0030036 | 5.64E-07 | 511  | 539  | actin cytoskeleton organization                          |
| GO:0043087 | 6.47E-07 | 509  | 538  | regulation of GTPase activity                            |
| GO:0032549 | 7.11E-07 | 1605 | 1762 | ribonucleoside binding                                   |
| GO:0043062 | 7.17E-07 | 362  | 379  | extracellular structure organization                     |
| GO:0051130 | 7.22E-07 | 1019 | 1104 | positive regulation of cellular component organization   |
| GO:0001883 | 7.51E-07 | 1604 | 1761 | purine nucleoside binding                                |
| GO:0030198 | 7.52E-07 | 361  | 378  | extracellular matrix organization                        |
| GO:0048471 | 7.90E-07 | 590  | 630  | perinuclear region of cytoplasm                          |
| GO:0032550 | 8.06E-07 | 1602 | 1759 | purine ribonucleoside binding                            |
| GO:0005911 | 8.38E-07 | 357  | 374  | cell-cell junction                                       |
| GO:0030155 | 8.84E-07 | 579  | 617  | regulation of cell adhesion                              |
| GO:0060341 | 8.90E-07 | 1125 | 1227 | regulation of cellular localization                      |
| GO:0022857 | 9.04E-07 | 866  | 941  | transmembrane transporter activity                       |
| GO:0019899 | 9.12E-07 | 1530 | 1671 | enzyme binding                                           |
| GO:0016477 | 9.17E-07 | 1082 | 1171 | cell migration                                           |
| GO:0034330 | 9.34E-07 | 246  | 253  | cell junction organization                               |
| GO:0043269 | 9.61E-07 | 548  | 584  | regulation of ion transport                              |
| GO:0010647 | 9.70E-07 | 1446 | 1581 | positive regulation of cell communication                |
| GO:0031399 | 1.11E-06 | 1567 | 1718 | regulation of protein modification process               |
| GO:0035639 | 1.15E-06 | 1593 | 1750 | purine ribonucleoside triphosphate binding               |
| GO:0006955 | 1.20E-06 | 1422 | 1571 | immune response                                          |
| GO:0023056 | 1.37E-06 | 1427 | 1561 | positive regulation of signaling                         |
| GO:0032880 | 1.47E-06 | 862  | 935  | regulation of protein localization                       |
| GO:0043408 | 1.55E-06 | 713  | 768  | regulation of MAPK cascade                               |
| GO:0033036 | 1.65E-06 | 2419 | 2686 | macromolecule localization                               |
| GO:0015267 | 1.66E-06 | 412  | 437  | channel activity                                         |
| GO:0022803 | 1.66E-06 | 412  | 437  | passive transmembrane transporter activity               |
| GO:0018193 | 1.71E-06 | 1194 | 1304 | peptidyl-amino acid modification                         |
| GO:0017124 | 1.79E-06 | 114  | 114  | SH3 domain binding                                       |
| GO:0044431 | 1.84E-06 | 774  | 837  | Golgi apparatus part                                     |
| GO:0006954 | 1.86E-06 | 561  | 608  | inflammatory response                                    |
| GO:0043547 | 1.86E-06 | 461  | 487  | positive regulation of GTPase activity                   |
| GO:0036477 | 1.97E-06 | 607  | 647  | somatodendritic compartment                              |
| GO:0048870 | 2.09E-06 | 1171 | 1273 | cell motility                                            |
| GO:0051674 | 2.09E-06 | 1171 | 1273 | localization of cell                                     |
| GO:0007010 | 2.10E-06 | 969  | 1049 | cytoskeleton organization                                |
| GO:0007599 | 2.13E-06 | 517  | 551  | hemostasis                                               |
| GO:0031589 | 2.29E-06 | 287  | 298  | cell-substrate adhesion                                  |
| GO:0048646 | 2.39E-06 | 1065 | 1154 | anatomical structure formation involved in morphogenesis |
| GO:0005261 | 2.39E-06 | 278  | 290  | cation channel activity                                  |
| GO:0007160 | 2.67E-06 | 188  | 192  | cell-matrix adhesion                                     |
| GO:0007596 | 2.88E-06 | 512  | 546  | blood coagulation                                        |
| GO:0043085 | 2.97E-06 | 1366 | 1491 | positive regulation of catalytic activity                |
| GO:0005856 | 2.97E-06 | 1706 | 1879 | cytoskeleton                                             |
| GO:0071702 | 3.05E-06 | 2262 | 2515 | organic substance transport                              |
| GO:0009967 | 3.06E-06 | 1306 | 1427 | positive regulation of signal transduction               |
| GO:1901615 | 3.17E-06 | 494  | 530  | organic hydroxy compound metabolic process               |
| GO:0045321 | 3.79E-06 | 630  | 680  | leukocyte activation                                     |
| GO:0031401 | 4.33E-06 | 1071 | 1167 | positive regulation of protein modification process      |
| GO:0050817 | 4.63E-06 | 514  | 549  | coagulation                                              |

|            |          |      |       |                                                       |
|------------|----------|------|-------|-------------------------------------------------------|
| GO:0004871 | 4.73E-06 | 1137 | 1248  | signal transducer activity                            |
| GO:0016310 | 5.07E-06 | 1890 | 2083  | phosphorylation                                       |
| GO:0051345 | 5.53E-06 | 752  | 810   | positive regulation of hydrolase activity             |
| GO:0045202 | 5.85E-06 | 692  | 740   | synapse                                               |
| GO:0016740 | 5.86E-06 | 1928 | 2136  | transferase activity                                  |
| GO:0009986 | 6.09E-06 | 655  | 708   | cell surface                                          |
| GO:0009605 | 6.68E-06 | 2145 | 2376  | response to external stimulus                         |
| GO:0005509 | 6.78E-06 | 606  | 654   | calcium ion binding                                   |
| GO:0031252 | 6.95E-06 | 339  | 354   | cell leading edge                                     |
| GO:0001944 | 6.95E-06 | 577  | 617   | vasculature development                               |
| GO:0001568 | 7.33E-06 | 556  | 594   | blood vessel development                              |
| GO:0051336 | 7.54E-06 | 1107 | 1208  | regulation of hydrolase activity                      |
| GO:0032989 | 7.61E-06 | 1402 | 1526  | cellular component morphogenesis                      |
| GO:0031344 | 7.87E-06 | 484  | 512   | regulation of cell projection organization            |
| GO:0030425 | 8.23E-06 | 426  | 450   | dendrite                                              |
| GO:0022838 | 8.52E-06 | 383  | 407   | substrate-specific channel activity                   |
| GO:0043292 | 9.09E-06 | 201  | 208   | contractile fiber                                     |
| GO:0019898 | 1.01E-05 | 235  | 244   | extrinsic component of membrane                       |
| GO:0007167 | 1.07E-05 | 1128 | 1224  | enzyme linked receptor protein signaling pathway      |
| GO:0034329 | 1.12E-05 | 218  | 225   | cell junction assembly                                |
| GO:0099568 | 1.15E-05 | 244  | 253   | cytoplasmic region                                    |
| GO:0009653 | 1.23E-05 | 2474 | 2724  | anatomical structure morphogenesis                    |
| GO:0030695 | 1.32E-05 | 260  | 271   | GTPase regulator activity                             |
| GO:0003008 | 1.35E-05 | 1421 | 1563  | system process                                        |
| GO:0045216 | 1.37E-05 | 214  | 221   | cell-cell junction organization                       |
| GO:0022891 | 1.41E-05 | 790  | 861   | substrate-specific transmembrane transporter activity |
| GO:0001932 | 1.41E-05 | 1225 | 1340  | regulation of protein phosphorylation                 |
| GO:0030154 | 1.46E-05 | 3283 | 3643  | cell differentiation                                  |
| GO:0050865 | 1.47E-05 | 423  | 453   | regulation of cell activation                         |
| GO:0051641 | 1.49E-05 | 2628 | 2925  | cellular localization                                 |
| GO:0051050 | 1.62E-05 | 826  | 899   | positive regulation of transport                      |
| GO:0098802 | 1.71E-05 | 163  | 167   | plasma membrane receptor complex                      |
| GO:0006887 | 1.74E-05 | 338  | 359   | exocytosis                                            |
| GO:0005938 | 1.79E-05 | 226  | 234   | cell cortex                                           |
| GO:0044093 | 1.81E-05 | 1595 | 1750  | positive regulation of molecular function             |
| GO:0003012 | 1.95E-05 | 362  | 384   | muscle system process                                 |
| GO:1901265 | 2.08E-05 | 2021 | 2239  | nucleoside phosphate binding                          |
| GO:0040011 | 2.15E-05 | 1621 | 1778  | locomotion                                            |
| GO:0000166 | 2.15E-05 | 2020 | 2238  | nucleotide binding                                    |
| GO:0007009 | 2.30E-05 | 254  | 265   | plasma membrane organization                          |
| GO:0030175 | 2.36E-05 | 92   | 92    | filopodium                                            |
| GO:0050839 | 2.37E-05 | 172  | 177   | cell adhesion molecule binding                        |
| GO:0022804 | 2.43E-05 | 316  | 336   | active transmembrane transporter activity             |
| GO:0048878 | 2.50E-05 | 902  | 986   | chemical homeostasis                                  |
| GO:0008610 | 2.55E-05 | 575  | 623   | lipid biosynthetic process                            |
| GO:0042221 | 2.59E-05 | 3484 | 3896  | response to chemical                                  |
| GO:0032403 | 2.76E-05 | 835  | 906   | protein complex binding                               |
| GO:0005515 | 2.89E-05 | 8986 | 10190 | protein binding                                       |
| GO:0051247 | 2.93E-05 | 1379 | 1516  | positive regulation of protein metabolic process      |
| GO:0005216 | 2.96E-05 | 373  | 397   | ion channel activity                                  |
| GO:0006629 | 3.01E-05 | 1159 | 1278  | lipid metabolic process                               |
| GO:0009581 | 3.05E-05 | 179  | 186   | detection of external stimulus                        |
| GO:0098772 | 3.08E-05 | 1095 | 1197  | molecular function regulator                          |
| GO:0044456 | 3.13E-05 | 559  | 597   | synapse part                                          |
| GO:0005829 | 3.16E-05 | 2886 | 3217  | cytosol                                               |
| GO:0050793 | 3.23E-05 | 1898 | 2086  | regulation of developmental process                   |
| GO:0051270 | 3.25E-05 | 687  | 740   | regulation of cellular component movement             |
| GO:0051246 | 3.32E-05 | 2262 | 2513  | regulation of protein metabolic process               |
| GO:0015629 | 3.38E-05 | 417  | 442   | actin cytoskeleton                                    |

|            |          |      |      |                                                                  |
|------------|----------|------|------|------------------------------------------------------------------|
| GO:0006814 | 3.59E-05 | 193  | 201  | sodium ion transport                                             |
| GO:0016324 | 3.67E-05 | 261  | 275  | apical plasma membrane                                           |
| GO:0006836 | 3.67E-05 | 175  | 180  | neurotransmitter transport                                       |
| GO:0030016 | 3.68E-05 | 190  | 197  | myofibril                                                        |
| GO:0008104 | 3.91E-05 | 2114 | 2349 | protein localization                                             |
| GO:0001934 | 3.96E-05 | 884  | 963  | positive regulation of protein phosphorylation                   |
| GO:0031032 | 4.06E-05 | 141  | 144  | actomyosin structure organization                                |
| GO:0031346 | 4.16E-05 | 280  | 293  | positive regulation of cell projection organization              |
| GO:0002694 | 4.17E-05 | 391  | 419  | regulation of leukocyte activation                               |
| GO:0050900 | 4.22E-05 | 323  | 345  | leukocyte migration                                              |
| GO:0007169 | 4.46E-05 | 849  | 918  | transmembrane receptor protein tyrosine kinase signaling pathway |
| GO:0034220 | 4.50E-05 | 896  | 979  | ion transmembrane transport                                      |
| GO:0032970 | 5.13E-05 | 288  | 303  | regulation of actin filament-based process                       |
| GO:0098602 | 5.18E-05 | 675  | 730  | single organism cell adhesion                                    |
| GO:0031012 | 5.23E-05 | 384  | 409  | extracellular matrix                                             |
| GO:0034332 | 5.38E-05 | 115  | 116  | adherens junction organization                                   |
| GO:0044433 | 5.60E-05 | 503  | 542  | cytoplasmic vesicle part                                         |
| GO:0042592 | 5.64E-05 | 1388 | 1534 | homeostatic process                                              |
| GO:0016787 | 5.84E-05 | 2008 | 2242 | hydrolase activity                                               |
| GO:0001505 | 5.89E-05 | 171  | 176  | regulation of neurotransmitter levels                            |
| GO:0043167 | 6.12E-05 | 5149 | 5801 | ion binding                                                      |
| GO:0044449 | 6.14E-05 | 184  | 191  | contractile fiber part                                           |
| GO:1901565 | 6.34E-05 | 328  | 351  | organonitrogen compound catabolic process                        |
| GO:0034765 | 6.41E-05 | 383  | 408  | regulation of ion transmembrane transport                        |
| GO:0000902 | 6.62E-05 | 1328 | 1448 | cell morphogenesis                                               |
| GO:0098858 | 6.65E-05 | 165  | 170  | actin-based cell projection                                      |
| GO:0044057 | 6.69E-05 | 470  | 504  | regulation of system process                                     |
| GO:0042325 | 6.80E-05 | 1301 | 1429 | regulation of phosphorylation                                    |
| GO:0098655 | 6.81E-05 | 639  | 693  | cation transmembrane transport                                   |
| GO:0098552 | 7.00E-05 | 386  | 413  | side of membrane                                                 |
| GO:0042127 | 7.41E-05 | 1336 | 1468 | regulation of cell proliferation                                 |
| GO:0008289 | 7.52E-05 | 567  | 613  | lipid binding                                                    |
| GO:0044297 | 7.61E-05 | 452  | 483  | cell body                                                        |
| GO:0045177 | 7.90E-05 | 326  | 347  | apical part of cell                                              |
| GO:0030030 | 7.98E-05 | 1349 | 1473 | cell projection organization                                     |
| GO:0030334 | 8.53E-05 | 600  | 646  | regulation of cell migration                                     |
| GO:0048513 | 8.68E-05 | 2734 | 3033 | animal organ development                                         |
| GO:0010975 | 8.83E-05 | 368  | 388  | regulation of neuron projection development                      |
| GO:0005912 | 9.34E-05 | 434  | 461  | adherens junction                                                |
| GO:0046578 | 9.54E-05 | 176  | 181  | regulation of Ras protein signal transduction                    |
| GO:0007044 | 9.55E-05 | 86   | 86   | cell-substrate junction assembly                                 |
| GO:0008236 | 1.02E-04 | 156  | 164  | serine-type peptidase activity                                   |
| GO:0032270 | 1.02E-04 | 1292 | 1422 | positive regulation of cellular protein metabolic process        |
| GO:0098793 | 1.04E-04 | 248  | 260  | presynapse                                                       |
| GO:0046649 | 1.06E-04 | 535  | 579  | lymphocyte activation                                            |
| GO:0044255 | 1.06E-04 | 905  | 995  | cellular lipid metabolic process                                 |
| GO:0019220 | 1.11E-04 | 1500 | 1654 | regulation of phosphate metabolic process                        |
| GO:0000139 | 1.11E-04 | 604  | 655  | Golgi membrane                                                   |
| GO:0051240 | 1.16E-04 | 1271 | 1396 | positive regulation of multicellular organismal process          |
| GO:0032268 | 1.19E-04 | 2107 | 2343 | regulation of cellular protein metabolic process                 |
| GO:0015075 | 1.20E-04 | 727  | 794  | ion transmembrane transporter activity                           |
| GO:0001667 | 1.22E-04 | 303  | 320  | ameboidal-type cell migration                                    |
| GO:0070887 | 1.22E-04 | 2500 | 2786 | cellular response to chemical stimulus                           |
| GO:0070161 | 1.22E-04 | 449  | 478  | anchoring junction                                               |
| GO:0005768 | 1.25E-04 | 695  | 756  | endosome                                                         |
| GO:0002684 | 1.26E-04 | 807  | 885  | positive regulation of immune system process                     |
| GO:0010562 | 1.35E-04 | 1018 | 1116 | positive regulation of phosphorus metabolic process              |
| GO:0045937 | 1.35E-04 | 1018 | 1116 | positive regulation of phosphate metabolic process               |
| GO:0006820 | 1.35E-04 | 521  | 565  | anion transport                                                  |

|            |          |      |      |                                                          |
|------------|----------|------|------|----------------------------------------------------------|
| GO:0030100 | 1.37E-04 | 188  | 196  | regulation of endocytosis                                |
| GO:0006812 | 1.46E-04 | 914  | 1003 | cation transport                                         |
| GO:0031984 | 1.52E-04 | 269  | 285  | organelle subcompartment                                 |
| GO:0030424 | 1.56E-04 | 398  | 424  | axon                                                     |
| GO:0098588 | 1.61E-04 | 2010 | 2243 | bounding membrane of organelle                           |
| GO:1903034 | 1.61E-04 | 352  | 379  | regulation of response to wounding                       |
| GO:0005096 | 1.61E-04 | 232  | 243  | GTPase activator activity                                |
| GO:0005578 | 1.62E-04 | 330  | 351  | proteinaceous extracellular matrix                       |
| GO:0006936 | 1.62E-04 | 301  | 320  | muscle contraction                                       |
| GO:0099503 | 1.64E-04 | 393  | 424  | secretory vesicle                                        |
| GO:0042327 | 1.71E-04 | 915  | 1001 | positive regulation of phosphorylation                   |
| GO:0006952 | 1.71E-04 | 1512 | 1685 | defense response                                         |
| GO:0030027 | 1.72E-04 | 167  | 172  | lamellipodium                                            |
| GO:2000145 | 1.73E-04 | 632  | 683  | regulation of cell motility                              |
| GO:0016337 | 1.73E-04 | 630  | 683  | single organismal cell-cell adhesion                     |
| GO:0043025 | 1.75E-04 | 400  | 427  | neuronal cell body                                       |
| GO:0035637 | 1.77E-04 | 178  | 185  | multicellular organismal signaling                       |
| GO:0051174 | 1.83E-04 | 1510 | 1667 | regulation of phosphorus metabolic process               |
| GO:0048871 | 1.94E-04 | 302  | 322  | multicellular organismal homeostasis                     |
| GO:0051056 | 2.02E-04 | 264  | 277  | regulation of small GTPase mediated signal transduction  |
| GO:1903827 | 2.06E-04 | 491  | 531  | regulation of cellular protein localization              |
| GO:0034762 | 2.07E-04 | 395  | 423  | regulation of transmembrane transport                    |
| GO:1901681 | 2.07E-04 | 214  | 226  | sulfur compound binding                                  |
| GO:0010256 | 2.09E-04 | 491  | 529  | endomembrane system organization                         |
| GO:0042991 | 2.12E-04 | 94   | 96   | transcription factor import into nucleus                 |
| GO:0048514 | 2.12E-04 | 467  | 501  | blood vessel morphogenesis                               |
| GO:0009582 | 2.12E-04 | 181  | 190  | detection of abiotic stimulus                            |
| GO:0010959 | 2.14E-04 | 307  | 326  | regulation of metal ion transport                        |
| GO:0030168 | 2.16E-04 | 241  | 254  | platelet activation                                      |
| GO:0051249 | 2.22E-04 | 341  | 366  | regulation of lymphocyte activation                      |
| GO:0070588 | 2.30E-04 | 241  | 254  | calcium ion transmembrane transport                      |
| GO:0015711 | 2.32E-04 | 380  | 409  | organic anion transport                                  |
| GO:0034333 | 2.39E-04 | 79   | 79   | adherens junction assembly                               |
| GO:2000026 | 2.44E-04 | 1445 | 1586 | regulation of multicellular organismal development       |
| GO:1902533 | 2.46E-04 | 884  | 969  | positive regulation of intracellular signal transduction |
| GO:0006898 | 2.48E-04 | 262  | 278  | receptor-mediated endocytosis                            |
| GO:0017171 | 2.50E-04 | 157  | 166  | serine hydrolase activity                                |
| GO:0030031 | 2.54E-04 | 342  | 365  | cell projection assembly                                 |
| GO:0030017 | 2.54E-04 | 167  | 174  | sarcomere                                                |
| GO:0019538 | 2.57E-04 | 4751 | 5364 | protein metabolic process                                |
| GO:1900180 | 2.61E-04 | 197  | 207  | regulation of protein localization to nucleus            |
| GO:0010033 | 2.63E-04 | 2621 | 2926 | response to organic substance                            |
| GO:0060589 | 2.69E-04 | 278  | 294  | nucleoside-triphosphatase regulator activity             |
| GO:0071310 | 2.76E-04 | 2086 | 2318 | cellular response to organic substance                   |
| GO:0012506 | 2.77E-04 | 451  | 486  | vesicle membrane                                         |
| GO:0018212 | 2.80E-04 | 306  | 325  | peptidyl-tyrosine modification                           |
| GO:0051649 | 2.81E-04 | 2267 | 2531 | establishment of localization in cell                    |
| GO:1990778 | 2.81E-04 | 195  | 204  | protein localization to cell periphery                   |
| GO:0010810 | 2.89E-04 | 166  | 172  | regulation of cell-substrate adhesion                    |
| GO:0042990 | 2.91E-04 | 91   | 93   | regulation of transcription factor import into nucleus   |
| GO:0070201 | 2.99E-04 | 731  | 800  | regulation of establishment of protein localization      |
| GO:0008360 | 3.02E-04 | 124  | 127  | regulation of cell shape                                 |
| GO:0005773 | 3.14E-04 | 538  | 585  | vacuole                                                  |
| GO:0007268 | 3.18E-04 | 647  | 700  | synaptic transmission                                    |
| GO:0099536 | 3.18E-04 | 647  | 700  | synaptic signaling                                       |
| GO:0099537 | 3.18E-04 | 647  | 700  | trans-synaptic signaling                                 |
| GO:0051648 | 3.21E-04 | 221  | 233  | vesicle localization                                     |
| GO:0018108 | 3.24E-04 | 304  | 323  | peptidyl-tyrosine phosphorylation                        |
| GO:0032409 | 3.24E-04 | 186  | 194  | regulation of transporter activity                       |

|            |          |      |      |                                                                             |
|------------|----------|------|------|-----------------------------------------------------------------------------|
| GO:0051650 | 3.31E-04 | 210  | 221  | establishment of vesicle localization                                       |
| GO:0097164 | 3.35E-04 | 166  | 174  | ammonium ion metabolic process                                              |
| GO:0034702 | 3.51E-04 | 258  | 273  | ion channel complex                                                         |
| GO:0002682 | 3.52E-04 | 1310 | 1453 | regulation of immune system process                                         |
| GO:0022603 | 3.53E-04 | 839  | 910  | regulation of anatomical structure morphogenesis                            |
| GO:0010648 | 3.55E-04 | 1073 | 1176 | negative regulation of cell communication                                   |
| GO:0040012 | 3.56E-04 | 681  | 739  | regulation of locomotion                                                    |
| GO:0006813 | 3.58E-04 | 199  | 209  | potassium ion transport                                                     |
| GO:0032956 | 3.63E-04 | 254  | 268  | regulation of actin cytoskeleton organization                               |
| GO:0045785 | 3.64E-04 | 345  | 369  | positive regulation of cell adhesion                                        |
| GO:1904019 | 3.70E-04 | 79   | 80   | epithelial cell apoptotic process                                           |
| GO:0071804 | 3.73E-04 | 166  | 173  | cellular potassium ion transport                                            |
| GO:0071805 | 3.73E-04 | 166  | 173  | potassium ion transmembrane transport                                       |
| GO:0006066 | 3.84E-04 | 348  | 375  | alcohol metabolic process                                                   |
| GO:0004702 | 4.06E-04 | 64   | 64   | receptor signaling protein serine/threonine kinase activity                 |
| GO:0030659 | 4.07E-04 | 433  | 467  | cytoplasmic vesicle membrane                                                |
| GO:0044087 | 4.07E-04 | 654  | 709  | regulation of cellular component biogenesis                                 |
| GO:0001726 | 4.07E-04 | 153  | 158  | ruffle                                                                      |
| GO:0007507 | 4.18E-04 | 487  | 523  | heart development                                                           |
| GO:0031267 | 4.29E-04 | 232  | 244  | small GTPase binding                                                        |
| GO:0001952 | 4.34E-04 | 90   | 91   | regulation of cell-matrix adhesion                                          |
| GO:0072659 | 4.48E-04 | 193  | 202  | protein localization to plasma membrane                                     |
| GO:0050867 | 4.58E-04 | 265  | 283  | positive regulation of cell activation                                      |
| GO:0002460 | 4.59E-04 | 196  | 209  | adaptive immune response based on somatic recombination of immune receptors |
| GO:1903649 | 4.69E-04 | 412  | 445  | regulation of cytoplasmic transport                                         |
| GO:0032412 | 4.73E-04 | 169  | 176  | regulation of ion transmembrane transporter activity                        |
| GO:0007602 | 4.78E-04 | 109  | 113  | phototransduction                                                           |
| GO:0048489 | 4.81E-04 | 101  | 103  | synaptic vesicle transport                                                  |
| GO:0097480 | 4.81E-04 | 101  | 103  | establishment of synaptic vesicle localization                              |
| GO:0015085 | 4.88E-04 | 119  | 122  | calcium ion transmembrane transporter activity                              |
| GO:0032386 | 4.91E-04 | 552  | 601  | regulation of intracellular transport                                       |
| GO:0015850 | 4.93E-04 | 208  | 221  | organic hydroxy compound transport                                          |
| GO:0044710 | 5.03E-04 | 4702 | 5325 | single-organism metabolic process                                           |
| GO:0098791 | 5.06E-04 | 254  | 270  | Golgi subcompartment                                                        |
| GO:0043410 | 5.07E-04 | 539  | 585  | positive regulation of MAPK cascade                                         |
| GO:0002521 | 5.09E-04 | 407  | 439  | leukocyte differentiation                                                   |
| GO:0044712 | 5.17E-04 | 962  | 1065 | single-organism catabolic process                                           |
| GO:0007229 | 5.30E-04 | 85   | 86   | integrin-mediated signaling pathway                                         |
| GO:0046822 | 5.35E-04 | 200  | 211  | regulation of nucleocytoplasmic transport                                   |
| GO:0099504 | 5.42E-04 | 84   | 85   | synaptic vesicle cycle                                                      |
| GO:0015079 | 5.56E-04 | 135  | 140  | potassium ion transmembrane transporter activity                            |
| GO:0070665 | 5.63E-04 | 123  | 128  | positive regulation of leukocyte proliferation                              |
| GO:0051046 | 5.66E-04 | 612  | 668  | regulation of secretion                                                     |
| GO:0009583 | 5.68E-04 | 122  | 127  | detection of light stimulus                                                 |
| GO:0007399 | 5.69E-04 | 2121 | 2341 | nervous system development                                                  |
| GO:0001738 | 5.81E-04 | 66   | 66   | morphogenesis of a polarized epithelium                                     |
| GO:0098660 | 6.01E-04 | 649  | 709  | inorganic ion transmembrane transport                                       |
| GO:0098662 | 6.06E-04 | 577  | 628  | inorganic cation transmembrane transport                                    |
| GO:0060627 | 6.10E-04 | 362  | 389  | regulation of vesicle-mediated transport                                    |
| GO:0090002 | 6.13E-04 | 129  | 133  | establishment of protein localization to plasma membrane                    |
| GO:0098857 | 6.19E-04 | 271  | 287  | membrane microdomain                                                        |
| GO:0004872 | 6.25E-04 | 1053 | 1172 | receptor activity                                                           |
| GO:0060089 | 6.25E-04 | 1053 | 1172 | molecular transducer activity                                               |
| GO:0007015 | 6.32E-04 | 296  | 314  | actin filament organization                                                 |
| GO:0050727 | 6.66E-04 | 248  | 267  | regulation of inflammatory response                                         |
| GO:0008015 | 6.74E-04 | 456  | 493  | blood circulation                                                           |
| GO:0045121 | 6.74E-04 | 270  | 286  | membrane raft                                                               |
| GO:0019900 | 6.82E-04 | 544  | 587  | kinase binding                                                              |
| GO:0007045 | 6.86E-04 | 69   | 69   | cell-substrate adherens junction assembly                                   |

|            |          |       |       |                                                       |
|------------|----------|-------|-------|-------------------------------------------------------|
| GO:0048041 | 6.86E-04 | 69    | 69    | focal adhesion assembly                               |
| GO:0001525 | 6.91E-04 | 393   | 422   | angiogenesis                                          |
| GO:0050776 | 7.16E-04 | 848   | 935   | regulation of immune response                         |
| GO:0044853 | 7.20E-04 | 85    | 86    | plasma membrane raft                                  |
| GO:0065007 | 7.26E-04 | 9134  | 10379 | biological regulation                                 |
| GO:0005516 | 7.32E-04 | 166   | 173   | calmodulin binding                                    |
| GO:0051235 | 7.40E-04 | 268   | 286   | maintenance of location                               |
| GO:0061572 | 7.67E-04 | 119   | 122   | actin filament bundle organization                    |
| GO:0001816 | 7.73E-04 | 560   | 614   | cytokine production                                   |
| GO:0004713 | 7.74E-04 | 135   | 139   | protein tyrosine kinase activity                      |
| GO:0008324 | 7.78E-04 | 541   | 590   | cation transmembrane transporter activity             |
| GO:0046777 | 7.79E-04 | 216   | 227   | protein autophosphorylation                           |
| GO:0023057 | 7.91E-04 | 1061  | 1165  | negative regulation of signaling                      |
| GO:0019901 | 8.11E-04 | 486   | 523   | protein kinase binding                                |
| GO:0007159 | 8.16E-04 | 420   | 455   | leukocyte cell-cell adhesion                          |
| GO:0008047 | 8.16E-04 | 405   | 436   | enzyme activator activity                             |
| GO:0004252 | 8.17E-04 | 132   | 140   | serine-type endopeptidase activity                    |
| GO:0008150 | 8.18E-04 | 13342 | 15286 | biological process                                    |
| GO:0002696 | 8.24E-04 | 257   | 275   | positive regulation of leukocyte activation           |
| GO:0099531 | 8.38E-04 | 141   | 146   | presynaptic process involved in synaptic transmission |
| GO:0032946 | 8.44E-04 | 119   | 124   | positive regulation of mononuclear cell proliferation |
| GO:0004620 | 8.51E-04 | 83    | 85    | phospholipase activity                                |
| GO:0002520 | 8.55E-04 | 717   | 784   | immune system development                             |
| GO:0010638 | 8.63E-04 | 515   | 560   | positive regulation of organelle organization         |
| GO:0044448 | 8.82E-04 | 114   | 117   | cell cortex part                                      |
| GO:0061337 | 9.12E-04 | 124   | 128   | cardiac conduction                                    |
| GO:0050778 | 9.22E-04 | 566   | 620   | positive regulation of immune response                |
| GO:0010927 | 9.29E-04 | 257   | 275   | cellular component assembly involved in morphogenesis |
| GO:0055065 | 9.33E-04 | 497   | 542   | metal ion homeostasis                                 |
| GO:0030141 | 9.36E-04 | 289   | 313   | secretory granule                                     |
| GO:0010976 | 9.46E-04 | 210   | 220   | positive regulation of neuron projection development  |
| GO:0050671 | 9.74E-04 | 117   | 122   | positive regulation of lymphocyte proliferation       |
| GO:0003013 | 9.78E-04 | 458   | 496   | circulatory system process                            |
| GO:0070727 | 9.82E-04 | 1346  | 1495  | cellular macromolecule localization                   |
| GO:0000323 | 9.91E-04 | 458   | 498   | lytic vacuole                                         |
| GO:0005764 | 9.91E-04 | 458   | 498   | lysosome                                              |
| GO:0008233 | 9.94E-04 | 506   | 557   | peptidase activity                                    |
| GO:0042439 | 1.01E-03 | 83    | 85    | ethanolamine-containing compound metabolic process    |
| GO:0030234 | 1.02E-03 | 814   | 896   | enzyme regulator activity                             |
| GO:0046942 | 1.03E-03 | 274   | 294   | carboxylic acid transport                             |
| GO:0030055 | 1.04E-03 | 368   | 393   | cell-substrate junction                               |
| GO:0006644 | 1.05E-03 | 327   | 352   | phospholipid metabolic process                        |
| GO:0070011 | 1.09E-03 | 489   | 538   | peptidase activity acting on L-amino acid peptides    |
| GO:0051020 | 1.10E-03 | 251   | 266   | GTPase binding                                        |
| GO:0022898 | 1.11E-03 | 171   | 179   | regulation of transmembrane transporter activity      |
| GO:0042692 | 1.12E-03 | 335   | 358   | muscle cell differentiation                           |
| GO:0044089 | 1.13E-03 | 370   | 398   | positive regulation of cellular component biogenesis  |
| GO:0019897 | 1.15E-03 | 125   | 129   | extrinsic component of plasma membrane                |
| GO:0043235 | 1.15E-03 | 297   | 317   | receptor complex                                      |
| GO:0051251 | 1.16E-03 | 235   | 251   | positive regulation of lymphocyte activation          |
| GO:0051017 | 1.16E-03 | 115   | 118   | actin filament bundle assembly                        |
| GO:0070371 | 1.16E-03 | 225   | 240   | ERK1 and ERK2 cascade                                 |
| GO:0005924 | 1.17E-03 | 365   | 390   | cell-substrate adherens junction                      |
| GO:0009888 | 1.17E-03 | 1570  | 1733  | tissue development                                    |
| GO:0006816 | 1.18E-03 | 344   | 370   | calcium ion transport                                 |
| GO:0007266 | 1.19E-03 | 152   | 158   | Rho protein signal transduction                       |
| GO:0030048 | 1.20E-03 | 104   | 107   | actin filament-based movement                         |
| GO:1904589 | 1.23E-03 | 167   | 176   | regulation of protein import                          |
| GO:0022836 | 1.28E-03 | 285   | 305   | gated channel activity                                |



|            |          |      |      |                                                                 |
|------------|----------|------|------|-----------------------------------------------------------------|
| GO:0008283 | 1.32E-03 | 1685 | 1871 | cell proliferation                                              |
| GO:0034613 | 1.32E-03 | 1337 | 1486 | cellular protein localization                                   |
| GO:0045055 | 1.32E-03 | 158  | 166  | regulated exocytosis                                            |
| GO:1902495 | 1.34E-03 | 286  | 306  | transmembrane transporter complex                               |
| GO:1903037 | 1.34E-03 | 267  | 287  | regulation of leukocyte cell-cell adhesion                      |
| GO:0002526 | 1.35E-03 | 124  | 131  | acute inflammatory response                                     |
| GO:0022890 | 1.36E-03 | 458  | 498  | inorganic cation transmembrane transporter activity             |
| GO:0005160 | 1.37E-03 | 49   | 49   | transforming growth factor beta receptor binding                |
| GO:0098609 | 1.38E-03 | 774  | 850  | cell-cell adhesion                                              |
| GO:1904062 | 1.40E-03 | 198  | 209  | regulation of cation transmembrane transport                    |
| GO:0017016 | 1.41E-03 | 214  | 226  | Ras GTPase binding                                              |
| GO:0040007 | 1.44E-03 | 879  | 963  | growth                                                          |
| GO:1903829 | 1.44E-03 | 313  | 338  | positive regulation of cellular protein localization            |
| GO:0051493 | 1.47E-03 | 376  | 405  | regulation of cytoskeleton organization                         |
| GO:0031253 | 1.47E-03 | 275  | 294  | cell projection membrane                                        |
| GO:0008081 | 1.48E-03 | 84   | 86   | phosphoric diester hydrolase activity                           |
| GO:0097479 | 1.48E-03 | 106  | 109  | synaptic vesicle localization                                   |
| GO:0008285 | 1.52E-03 | 590  | 642  | negative regulation of cell proliferation                       |
| GO:0051015 | 1.53E-03 | 112  | 115  | actin filament binding                                          |
| GO:0005802 | 1.53E-03 | 158  | 166  | trans-Golgi network                                             |
| GO:0045807 | 1.55E-03 | 110  | 114  | positive regulation of endocytosis                              |
| GO:0010469 | 1.55E-03 | 116  | 120  | regulation of receptor activity                                 |
| GO:0033043 | 1.55E-03 | 941  | 1037 | regulation of organelle organization                            |
| GO:0007267 | 1.55E-03 | 1067 | 1176 | cell-cell signaling                                             |
| GO:0042306 | 1.56E-03 | 164  | 173  | regulation of protein import into nucleus                       |
| GO:0046470 | 1.56E-03 | 65   | 66   | phosphatidylcholine metabolic process                           |
| GO:0032101 | 1.58E-03 | 775  | 856  | regulation of response to external stimulus                     |
| GO:0048534 | 1.58E-03 | 679  | 743  | hematopoietic or lymphoid organ development                     |
| GO:0031234 | 1.58E-03 | 93   | 95   | extrinsic component of cytoplasmic side of plasma membrane      |
| GO:0015849 | 1.63E-03 | 276  | 297  | organic acid transport                                          |
| GO:0022843 | 1.63E-03 | 137  | 143  | voltage-gated cation channel activity                           |
| GO:1903522 | 1.64E-03 | 276  | 295  | regulation of blood circulation                                 |
| GO:0005178 | 1.65E-03 | 100  | 103  | integrin binding                                                |
| GO:0051094 | 1.66E-03 | 1034 | 1135 | positive regulation of developmental process                    |
| GO:0070302 | 1.67E-03 | 183  | 193  | regulation of stress-activated protein kinase signaling cascade |
| GO:0005925 | 1.70E-03 | 360  | 385  | focal adhesion                                                  |
| GO:0043230 | 1.70E-03 | 2356 | 2652 | extracellular organelle                                         |
| GO:1903561 | 1.70E-03 | 2356 | 2652 | extracellular vesicle                                           |
| GO:0007269 | 1.72E-03 | 133  | 138  | neurotransmitter secretion                                      |
| GO:0034110 | 1.72E-03 | 275  | 296  | regulation of homotypic cell-cell adhesion                      |
| GO:0001508 | 1.73E-03 | 114  | 118  | action potential                                                |
| GO:0032231 | 1.75E-03 | 74   | 75   | regulation of actin filament bundle assembly                    |
| GO:0005262 | 1.75E-03 | 104  | 107  | calcium channel activity                                        |
| GO:0032872 | 1.75E-03 | 182  | 192  | regulation of stress-activated MAPK cascade                     |
| GO:0009416 | 1.81E-03 | 329  | 356  | response to light stimulus                                      |
| GO:0002274 | 1.81E-03 | 145  | 153  | myeloid leukocyte activation                                    |
| GO:0034109 | 1.88E-03 | 444  | 483  | homotypic cell-cell adhesion                                    |
| GO:0050801 | 1.89E-03 | 600  | 659  | ion homeostasis                                                 |
| GO:0044282 | 1.89E-03 | 314  | 341  | small molecule catabolic process                                |
| GO:0005539 | 1.89E-03 | 185  | 197  | glycosaminoglycan binding                                       |
| GO:0008654 | 1.90E-03 | 216  | 231  | phospholipid biosynthetic process                               |
| GO:0048585 | 1.90E-03 | 1208 | 1335 | negative regulation of response to stimulus                     |
| GO:0051223 | 1.92E-03 | 662  | 728  | regulation of protein transport                                 |
| GO:0007164 | 1.93E-03 | 56   | 56   | establishment of tissue polarity                                |
| GO:0030139 | 1.94E-03 | 228  | 243  | endocytic vesicle                                               |
| GO:0065010 | 1.95E-03 | 2344 | 2639 | extracellular membrane-bounded organelle                        |
| GO:0070062 | 1.95E-03 | 2344 | 2639 | extracellular exosome                                           |
| GO:0010631 | 1.95E-03 | 206  | 218  | epithelial cell migration                                       |
| GO:0031674 | 1.96E-03 | 113  | 117  | I band                                                          |

|            |          |      |      |                                                                          |
|------------|----------|------|------|--------------------------------------------------------------------------|
| GO:0009100 | 1.96E-03 | 491  | 537  | glycoprotein metabolic process                                           |
| GO:0005901 | 2.01E-03 | 75   | 76   | caveola                                                                  |
| GO:0030098 | 2.01E-03 | 270  | 290  | lymphocyte differentiation                                               |
| GO:0046474 | 2.05E-03 | 188  | 200  | glycerophospholipid biosynthetic process                                 |
| GO:0042391 | 2.05E-03 | 326  | 350  | regulation of membrane potential                                         |
| GO:0072511 | 2.06E-03 | 386  | 418  | divalent inorganic cation transport                                      |
| GO:1903530 | 2.06E-03 | 559  | 612  | regulation of secretion by cell                                          |
| GO:0001736 | 2.13E-03 | 55   | 55   | establishment of planar polarity                                         |
| GO:0048699 | 2.14E-03 | 1454 | 1598 | generation of neurons                                                    |
| GO:0009719 | 2.24E-03 | 1570 | 1742 | response to endogenous stimulus                                          |
| GO:0005884 | 2.27E-03 | 75   | 76   | actin filament                                                           |
| GO:0048666 | 2.28E-03 | 1121 | 1227 | neuron development                                                       |
| GO:0034394 | 2.29E-03 | 48   | 48   | protein localization to cell surface                                     |
| GO:0009584 | 2.31E-03 | 108  | 113  | detection of visible light                                               |
| GO:0022604 | 2.31E-03 | 468  | 503  | regulation of cell morphogenesis                                         |
| GO:0043491 | 2.32E-03 | 140  | 147  | protein kinase B signaling                                               |
| GO:0001570 | 2.32E-03 | 71   | 72   | vasculogenesis                                                           |
| GO:0031098 | 2.33E-03 | 266  | 284  | stress-activated protein kinase signaling cascade                        |
| GO:0070838 | 2.37E-03 | 384  | 416  | divalent metal ion transport                                             |
| GO:0007603 | 2.39E-03 | 94   | 98   | phototransduction visible light                                          |
| GO:0042113 | 2.41E-03 | 188  | 200  | B cell activation                                                        |
| GO:0050709 | 2.42E-03 | 100  | 104  | negative regulation of protein secretion                                 |
| GO:0030335 | 2.43E-03 | 350  | 378  | positive regulation of cell migration                                    |
| GO:0044273 | 2.44E-03 | 44   | 44   | sulfur compound catabolic process                                        |
| GO:0045184 | 2.44E-03 | 1720 | 1924 | establishment of protein localization                                    |
| GO:0071705 | 2.49E-03 | 696  | 767  | nitrogen compound transport                                              |
| GO:0090130 | 2.49E-03 | 213  | 226  | tissue migration                                                         |
| GO:0050863 | 2.50E-03 | 257  | 277  | regulation of T cell activation                                          |
| GO:0005518 | 2.55E-03 | 65   | 66   | collagen binding                                                         |
| GO:0098771 | 2.56E-03 | 549  | 603  | inorganic ion homeostasis                                                |
| GO:0030018 | 2.57E-03 | 99   | 102  | Z disc                                                                   |
| GO:0072562 | 2.58E-03 | 100  | 106  | blood microparticle                                                      |
| GO:0030097 | 2.59E-03 | 636  | 697  | hemopoiesis                                                              |
| GO:0045597 | 2.61E-03 | 750  | 819  | positive regulation of cell differentiation                              |
| GO:0051640 | 2.65E-03 | 412  | 447  | organelle localization                                                   |
| GO:0050804 | 2.68E-03 | 265  | 282  | modulation of synaptic transmission                                      |
| GO:0005913 | 2.69E-03 | 53   | 53   | cell-cell adherens junction                                              |
| GO:0044283 | 2.72E-03 | 477  | 524  | small molecule biosynthetic process                                      |
| GO:0015291 | 2.78E-03 | 202  | 216  | secondary active transmembrane transporter activity                      |
| GO:0016298 | 2.84E-03 | 94   | 98   | lipase activity                                                          |
| GO:0042044 | 2.85E-03 | 46   | 46   | fluid transport                                                          |
| GO:0009968 | 2.85E-03 | 958  | 1054 | negative regulation of signal transduction                               |
| GO:0006869 | 2.87E-03 | 269  | 291  | lipid transport                                                          |
| GO:0022008 | 2.88E-03 | 1525 | 1679 | neurogenesis                                                             |
| GO:0015081 | 2.92E-03 | 122  | 128  | sodium ion transmembrane transporter activity                            |
| GO:0070372 | 2.93E-03 | 212  | 227  | regulation of ERK1 and ERK2 cascade                                      |
| GO:0043406 | 2.97E-03 | 194  | 206  | positive regulation of MAP kinase activity                               |
| GO:0055001 | 2.97E-03 | 145  | 152  | muscle cell development                                                  |
| GO:0045087 | 2.98E-03 | 922  | 1025 | innate immune response                                                   |
| GO:0045017 | 3.00E-03 | 248  | 267  | glycerolipid biosynthetic process                                        |
| GO:0005244 | 3.00E-03 | 173  | 183  | voltage-gated ion channel activity                                       |
| GO:0022832 | 3.00E-03 | 173  | 183  | voltage-gated channel activity                                           |
| GO:0005088 | 3.03E-03 | 122  | 126  | Ras guanyl-nucleotide exchange factor activity                           |
| GO:0005543 | 3.05E-03 | 312  | 336  | phospholipid binding                                                     |
| GO:0070304 | 3.08E-03 | 128  | 134  | positive regulation of stress-activated protein kinase signaling cascade |
| GO:0006875 | 3.12E-03 | 437  | 478  | cellular metal ion homeostasis                                           |
| GO:0016050 | 3.15E-03 | 258  | 278  | vesicle organization                                                     |
| GO:0030182 | 3.17E-03 | 1355 | 1489 | neuron differentiation                                                   |
| GO:0070486 | 3.18E-03 | 388  | 422  | leukocyte aggregation                                                    |

|            |          |      |      |                                                                |
|------------|----------|------|------|----------------------------------------------------------------|
| GO:0044430 | 3.19E-03 | 1221 | 1359 | cytoskeletal part                                              |
| GO:0042445 | 3.19E-03 | 166  | 177  | hormone metabolic process                                      |
| GO:0002576 | 3.20E-03 | 82   | 85   | platelet degranulation                                         |
| GO:0014069 | 3.20E-03 | 185  | 194  | postsynaptic density                                           |
| GO:0099572 | 3.20E-03 | 185  | 194  | postsynaptic specialization                                    |
| GO:0032874 | 3.24E-03 | 127  | 133  | positive regulation of stress-activated MAPK cascade           |
| GO:0009306 | 3.24E-03 | 434  | 474  | protein secretion                                              |
| GO:0001817 | 3.25E-03 | 503  | 554  | regulation of cytokine production                              |
| GO:0043500 | 3.36E-03 | 79   | 81   | muscle adaptation                                              |
| GO:0071495 | 3.36E-03 | 1220 | 1348 | cellular response to endogenous stimulus                       |
| GO:0072376 | 3.37E-03 | 67   | 70   | protein activation cascade                                     |
| GO:0032388 | 3.39E-03 | 324  | 352  | positive regulation of intracellular transport                 |
| GO:0097190 | 3.41E-03 | 568  | 622  | apoptotic signaling pathway                                    |
| GO:0000149 | 3.42E-03 | 112  | 117  | SNARE binding                                                  |
| GO:1904035 | 3.46E-03 | 57   | 58   | regulation of epithelial cell apoptotic process                |
| GO:0022407 | 3.47E-03 | 343  | 372  | regulation of cell-cell adhesion                               |
| GO:1903533 | 3.49E-03 | 271  | 293  | regulation of protein targeting                                |
| GO:0070663 | 3.49E-03 | 184  | 197  | regulation of leukocyte proliferation                          |
| GO:0080134 | 3.51E-03 | 1250 | 1393 | regulation of response to stress                               |
| GO:0090132 | 3.52E-03 | 208  | 221  | epithelium migration                                           |
| GO:0097581 | 3.59E-03 | 70   | 71   | lamellipodium organization                                     |
| GO:0055074 | 3.72E-03 | 342  | 372  | calcium ion homeostasis                                        |
| GO:0006892 | 3.74E-03 | 111  | 116  | post-Golgi vesicle-mediated transport                          |
| GO:0019932 | 3.84E-03 | 222  | 237  | second-messenger-mediated signaling                            |
| GO:0090066 | 3.86E-03 | 422  | 457  | regulation of anatomical structure size                        |
| GO:1901700 | 3.87E-03 | 1421 | 1582 | response to oxygen-containing compound                         |
| GO:0061061 | 3.88E-03 | 529  | 575  | muscle structure development                                   |
| GO:0002250 | 3.93E-03 | 293  | 321  | adaptive immune response                                       |
| GO:0005267 | 4.00E-03 | 112  | 117  | potassium channel activity                                     |
| GO:0018209 | 4.01E-03 | 229  | 244  | peptidyl-serine modification                                   |
| GO:0051588 | 4.06E-03 | 63   | 64   | regulation of neurotransmitter transport                       |
| GO:0001725 | 4.07E-03 | 52   | 52   | stress fiber                                                   |
| GO:0097517 | 4.07E-03 | 52   | 52   | contractile actin filament bundle                              |
| GO:0042102 | 4.11E-03 | 87   | 91   | positive regulation of T cell proliferation                    |
| GO:0009898 | 4.12E-03 | 145  | 152  | cytoplasmic side of plasma membrane                            |
| GO:0051098 | 4.14E-03 | 261  | 280  | regulation of binding                                          |
| GO:0006874 | 4.21E-03 | 331  | 360  | cellular calcium ion homeostasis                               |
| GO:0002440 | 4.25E-03 | 136  | 145  | production of molecular mediator of immune response            |
| GO:0030218 | 4.27E-03 | 91   | 94   | erythrocyte differentiation                                    |
| GO:0071593 | 4.39E-03 | 381  | 415  | lymphocyte aggregation                                         |
| GO:0005769 | 4.41E-03 | 266  | 286  | early endosome                                                 |
| GO:0014068 | 4.44E-03 | 60   | 61   | positive regulation of phosphatidylinositol 3-kinase signaling |
| GO:0008284 | 4.46E-03 | 725  | 798  | positive regulation of cell proliferation                      |
| GO:0042110 | 4.49E-03 | 380  | 414  | T cell activation                                              |
| GO:0070489 | 4.49E-03 | 380  | 414  | T cell aggregation                                             |
| GO:0046434 | 4.52E-03 | 142  | 150  | organophosphate catabolic process                              |
| GO:0042470 | 4.58E-03 | 98   | 102  | melanosome                                                     |
| GO:0048770 | 4.58E-03 | 98   | 102  | pigment granule                                                |
| GO:0046530 | 4.59E-03 | 58   | 59   | photoreceptor cell differentiation                             |
| GO:0031175 | 4.59E-03 | 997  | 1091 | neuron projection development                                  |
| GO:0015293 | 4.65E-03 | 126  | 133  | symporter activity                                             |
| GO:0010038 | 4.67E-03 | 305  | 330  | response to metal ion                                          |
| GO:0055080 | 4.68E-03 | 536  | 590  | cation homeostasis                                             |
| GO:0072509 | 4.74E-03 | 150  | 158  | divalent inorganic cation transmembrane transporter activity   |
| GO:0048519 | 4.78E-03 | 3951 | 4448 | negative regulation of biological process                      |
| GO:0003015 | 4.80E-03 | 240  | 257  | heart process                                                  |
| GO:0035091 | 4.82E-03 | 180  | 191  | phosphatidylinositol binding                                   |
| GO:1903391 | 4.85E-03 | 50   | 50   | regulation of adherens junction organization                   |
| GO:0051492 | 4.87E-03 | 64   | 65   | regulation of stress fiber assembly                            |

|            |          |      |      |                                                                            |
|------------|----------|------|------|----------------------------------------------------------------------------|
| GO:0010876 | 4.94E-03 | 297  | 323  | lipid localization                                                         |
| GO:0090175 | 4.98E-03 | 48   | 48   | regulation of establishment of planar polarity                             |
| GO:0098657 | 5.04E-03 | 45   | 45   | import into cell                                                           |
| GO:0001819 | 5.04E-03 | 350  | 384  | positive regulation of cytokine production                                 |
| GO:2001236 | 5.06E-03 | 146  | 154  | regulation of extrinsic apoptotic signaling pathway                        |
| GO:0019722 | 5.06E-03 | 140  | 148  | calcium-mediated signaling                                                 |
| GO:0070252 | 5.07E-03 | 85   | 88   | actin-mediated cell contraction                                            |
| GO:0007162 | 5.12E-03 | 205  | 219  | negative regulation of cell adhesion                                       |
| GO:0002237 | 5.12E-03 | 302  | 329  | response to molecule of bacterial origin                                   |
| GO:0006941 | 5.12E-03 | 138  | 146  | striated muscle contraction                                                |
| GO:0038023 | 5.13E-03 | 836  | 933  | signaling receptor activity                                                |
| GO:0006873 | 5.24E-03 | 481  | 529  | cellular ion homeostasis                                                   |
| GO:0031503 | 5.28E-03 | 98   | 103  | protein complex localization                                               |
| GO:0097191 | 5.30E-03 | 214  | 229  | extrinsic apoptotic signaling pathway                                      |
| GO:0044437 | 5.30E-03 | 345  | 376  | vacuolar part                                                              |
| GO:1901616 | 5.31E-03 | 64   | 66   | organic hydroxy compound catabolic process                                 |
| GO:0004715 | 5.32E-03 | 45   | 45   | non-membrane spanning protein tyrosine kinase activity                     |
| GO:0098794 | 5.32E-03 | 359  | 386  | postsynapse                                                                |
| GO:0060047 | 5.36E-03 | 238  | 255  | heart contraction                                                          |
| GO:1990351 | 5.57E-03 | 289  | 312  | transporter complex                                                        |
| GO:0002443 | 5.59E-03 | 252  | 275  | leukocyte mediated immunity                                                |
| GO:0044877 | 5.70E-03 | 1248 | 1382 | macromolecular complex binding                                             |
| GO:0048592 | 5.70E-03 | 143  | 150  | eye morphogenesis                                                          |
| GO:0042578 | 5.70E-03 | 307  | 332  | phosphoric ester hydrolase activity                                        |
| GO:0008328 | 5.72E-03 | 47   | 47   | ionotropic glutamate receptor complex                                      |
| GO:1903651 | 5.74E-03 | 244  | 264  | positive regulation of cytoplasmic transport                               |
| GO:1901618 | 5.79E-03 | 48   | 49   | organic hydroxy compound transmembrane transporter activity                |
| GO:0060071 | 5.80E-03 | 47   | 47   | Wnt signaling pathway planar cell polarity pathway                         |
| GO:0006023 | 5.86E-03 | 109  | 114  | aminoglycan biosynthetic process                                           |
| GO:0032944 | 5.99E-03 | 177  | 190  | regulation of mononuclear cell proliferation                               |
| GO:0007215 | 6.04E-03 | 67   | 68   | glutamate receptor signaling pathway                                       |
| GO:0051893 | 6.05E-03 | 48   | 48   | regulation of focal adhesion assembly                                      |
| GO:0090109 | 6.05E-03 | 48   | 48   | regulation of cell-substrate junction assembly                             |
| GO:1901617 | 6.12E-03 | 205  | 221  | organic hydroxy compound biosynthetic process                              |
| GO:0032844 | 6.13E-03 | 402  | 438  | regulation of homeostatic process                                          |
| GO:0005975 | 6.20E-03 | 865  | 962  | carbohydrate metabolic process                                             |
| GO:0070851 | 6.21E-03 | 118  | 125  | growth factor receptor binding                                             |
| GO:2000147 | 6.24E-03 | 358  | 389  | positive regulation of cell motility                                       |
| GO:0016358 | 6.26E-03 | 183  | 193  | dendrite development                                                       |
| GO:0045859 | 6.26E-03 | 770  | 847  | regulation of protein kinase activity                                      |
| GO:0035567 | 6.29E-03 | 62   | 63   | non-canonical Wnt signaling pathway                                        |
| GO:0002702 | 6.51E-03 | 60   | 62   | positive regulation of production of molecular mediator of immune response |
| GO:1903039 | 6.54E-03 | 189  | 203  | positive regulation of leukocyte cell-cell adhesion                        |
| GO:0014888 | 6.55E-03 | 41   | 41   | striated muscle adaptation                                                 |
| GO:0015031 | 6.56E-03 | 1587 | 1780 | protein transport                                                          |
| GO:0006024 | 6.57E-03 | 108  | 113  | glycosaminoglycan biosynthetic process                                     |
| GO:0045595 | 6.59E-03 | 1316 | 1454 | regulation of cell differentiation                                         |
| GO:0043270 | 6.63E-03 | 216  | 232  | positive regulation of ion transport                                       |
| GO:0050670 | 6.64E-03 | 175  | 188  | regulation of lymphocyte proliferation                                     |
| GO:0051272 | 6.67E-03 | 368  | 400  | positive regulation of cellular component movement                         |
| GO:1902532 | 6.68E-03 | 399  | 435  | negative regulation of intracellular signal transduction                   |
| GO:0034703 | 6.71E-03 | 157  | 166  | cation channel complex                                                     |
| GO:0006833 | 6.73E-03 | 39   | 39   | water transport                                                            |
| GO:0048017 | 6.86E-03 | 192  | 205  | inositol lipid-mediated signaling                                          |
| GO:0060395 | 6.87E-03 | 56   | 57   | SMAD protein signal transduction                                           |
| GO:0009893 | 6.91E-03 | 3117 | 3493 | positive regulation of metabolic process                                   |
| GO:0008238 | 6.94E-03 | 93   | 98   | exopeptidase activity                                                      |
| GO:0035725 | 6.96E-03 | 117  | 123  | sodium ion transmembrane transport                                         |
| GO:0051495 | 7.08E-03 | 172  | 183  | positive regulation of cytoskeleton organization                           |

|            |          |      |      |                                                                   |
|------------|----------|------|------|-------------------------------------------------------------------|
| GO:0002700 | 7.09E-03 | 91   | 96   | regulation of production of molecular mediator of immune response |
| GO:0045335 | 7.15E-03 | 78   | 81   | phagocytic vesicle                                                |
| GO:0051403 | 7.17E-03 | 245  | 263  | stress-activated MAPK cascade                                     |
| GO:0034112 | 7.20E-03 | 187  | 201  | positive regulation of homotypic cell-cell adhesion               |
| GO:0043492 | 7.20E-03 | 113  | 119  | ATPase activity coupled to movement of substances                 |
| GO:0006801 | 7.24E-03 | 51   | 52   | superoxide metabolic process                                      |
| GO:0030863 | 7.25E-03 | 77   | 79   | cortical cytoskeleton                                             |
| GO:0072507 | 7.33E-03 | 365  | 399  | divalent inorganic cation homeostasis                             |
| GO:0055002 | 7.38E-03 | 132  | 139  | striated muscle cell development                                  |
| GO:0015399 | 7.43E-03 | 108  | 114  | primary active transmembrane transporter activity                 |
| GO:0015405 | 7.43E-03 | 108  | 114  | P-P-bond-hydrolysis-driven transmembrane transporter activity     |
| GO:0002064 | 7.46E-03 | 205  | 218  | epithelial cell development                                       |
| GO:0017038 | 7.46E-03 | 290  | 315  | protein import                                                    |
| GO:0016042 | 7.48E-03 | 253  | 276  | lipid catabolic process                                           |
| GO:0000118 | 7.53E-03 | 58   | 59   | histone deacetylase complex                                       |
| GO:0001523 | 7.61E-03 | 80   | 84   | retinoid metabolic process                                        |
| GO:0034504 | 7.61E-03 | 314  | 341  | protein localization to nucleus                                   |
| GO:0051896 | 7.66E-03 | 116  | 122  | regulation of protein kinase B signaling                          |
| GO:0002819 | 7.87E-03 | 110  | 117  | regulation of adaptive immune response                            |
| GO:0032271 | 7.89E-03 | 161  | 171  | regulation of protein polymerization                              |
| GO:0009897 | 7.94E-03 | 213  | 231  | external side of plasma membrane                                  |
| GO:0006508 | 7.97E-03 | 1333 | 1499 | proteolysis                                                       |
| GO:0048015 | 8.13E-03 | 189  | 202  | phosphatidylinositol-mediated signaling                           |
| GO:0045664 | 8.15E-03 | 499  | 540  | regulation of neuron differentiation                              |
| GO:0030239 | 8.17E-03 | 53   | 54   | myofibril assembly                                                |
| GO:0007292 | 8.22E-03 | 97   | 102  | female gamete generation                                          |
| GO:1904950 | 8.25E-03 | 195  | 210  | negative regulation of establishment of protein localization      |
| GO:0009101 | 8.25E-03 | 441  | 485  | glycoprotein biosynthetic process                                 |
| GO:0051129 | 8.33E-03 | 552  | 604  | negative regulation of cellular component organization            |
| GO:0098562 | 8.37E-03 | 156  | 165  | cytoplasmic side of membrane                                      |
| GO:0034101 | 8.38E-03 | 96   | 100  | erythrocyte homeostasis                                           |
| GO:0019905 | 8.39E-03 | 80   | 83   | syntaxin binding                                                  |
| GO:0002697 | 8.45E-03 | 364  | 401  | regulation of immune effector process                             |
| GO:0002699 | 8.61E-03 | 137  | 147  | positive regulation of immune effector process                    |
| GO:0052689 | 8.63E-03 | 108  | 115  | carboxylic ester hydrolase activity                               |
| GO:0038083 | 8.65E-03 | 44   | 44   | peptidyl-tyrosine autophosphorylation                             |
| GO:0045185 | 8.73E-03 | 89   | 93   | maintenance of protein location                                   |
| GO:2001233 | 8.73E-03 | 343  | 374  | regulation of apoptotic signaling pathway                         |
| GO:0048278 | 8.95E-03 | 54   | 55   | vesicle docking                                                   |
| GO:0031091 | 8.98E-03 | 59   | 61   | platelet alpha granule                                            |
| GO:0006606 | 8.98E-03 | 247  | 267  | protein import into nucleus                                       |
| GO:0044744 | 8.98E-03 | 247  | 267  | protein targeting to nucleus                                      |
| GO:1902593 | 8.98E-03 | 247  | 267  | single-organism nuclear import                                    |
| GO:0030217 | 9.01E-03 | 192  | 206  | T cell differentiation                                            |
| GO:0043393 | 9.01E-03 | 159  | 169  | regulation of protein binding                                     |
| GO:0006790 | 9.05E-03 | 334  | 365  | sulfur compound metabolic process                                 |
| GO:0030003 | 9.06E-03 | 469  | 517  | cellular cation homeostasis                                       |
| GO:0032535 | 9.20E-03 | 300  | 323  | regulation of cellular component size                             |
| GO:0050870 | 9.35E-03 | 183  | 197  | positive regulation of T cell activation                          |
| GO:0050764 | 9.36E-03 | 64   | 66   | regulation of phagocytosis                                        |
| GO:0005085 | 9.42E-03 | 185  | 196  | guanyl-nucleotide exchange factor activity                        |
| GO:0015672 | 9.42E-03 | 504  | 555  | monovalent inorganic cation transport                             |
| GO:0030038 | 9.45E-03 | 74   | 76   | contractile actin filament bundle assembly                        |
| GO:0043149 | 9.45E-03 | 74   | 76   | stress fiber assembly                                             |
| GO:0051924 | 9.48E-03 | 193  | 207  | regulation of calcium ion transport                               |
| GO:0043068 | 9.50E-03 | 534  | 585  | positive regulation of programmed cell death                      |
| GO:0055082 | 9.51E-03 | 588  | 650  | cellular chemical homeostasis                                     |
| GO:0080135 | 9.52E-03 | 576  | 634  | regulation of cellular response to stress                         |
| GO:0006650 | 9.66E-03 | 241  | 261  | glycerophospholipid metabolic process                             |

|            |          |     |     |                                       |
|------------|----------|-----|-----|---------------------------------------|
| GO:0002456 | 9.70E-03 | 72  | 75  | T cell mediated immunity              |
| GO:0010035 | 9.75E-03 | 454 | 498 | response to inorganic substance       |
| GO:0048872 | 9.80E-03 | 208 | 224 | homeostasis of number of cells        |
| GO:0043409 | 9.83E-03 | 137 | 145 | negative regulation of MAPK cascade   |
| GO:2001257 | 9.83E-03 | 83  | 86  | regulation of cation channel activity |
| GO:0048589 | 9.87E-03 | 538 | 586 | developmental growth                  |
| GO:0050892 | 9.88E-03 | 31  | 31  | intestinal absorption                 |
| GO:0001948 | 9.94E-03 | 94  | 98  | glycoprotein binding                  |
