# Supplementary material for: Variations in 5-methylcytosine and 5-hydroxymethylcytosine among human brain, blood, and saliva using oxBS and the Infinium MethylationEPIC array
Source: PubMed Central journal article supplement — Biol Methods Protoc. 2016 Dec 27;1(1):1–8. doi: 10.1093/biomethods/bpw002 (PMC7164292; doi:10.1093/biomethods/bpw002), 2016-12-27
Supplement: supplementary_table_s3.pdf [file supplementary_table_s3.pdf]

**Supplementary Table S3: Significant GO terms (p < 0.01) related to the 5hmC-containing probes in Open Chromatin Regions**

Category = Gene ontology category

Over\_represented pvalue = p-value of the overrepresented gene ontology term

Number DE In Cat = The number of differentially expressed genes in the gene ontology category

Number In Cat = The total number of genes in the gene ontology category

GO term = Specific gene ontology term in the category

| Category   | over_represented pvalue | number DE In Cat | number In Cat | GO term                                   |
|------------|-------------------------|------------------|---------------|-------------------------------------------|
| GO:0044700 | 2.26E-12                | 3743             | 4716          | single organism signaling                 |
| GO:0023052 | 2.45E-12                | 3747             | 4721          | signaling                                 |
| GO:0007165 | 9.37E-12                | 3429             | 4321          | signal transduction                       |
| GO:0051716 | 2.19E-11                | 4214             | 5363          | cellular response to stimulus             |
| GO:0044425 | 4.63E-11                | 3735             | 4767          | membrane part                             |
| GO:0016020 | 2.26E-10                | 5218             | 6724          | membrane                                  |
| GO:0031224 | 1.79E-09                | 3014             | 3849          | intrinsic component of membrane           |
| GO:0048583 | 4.24E-09                | 2393             | 3001          | regulation of response to stimulus        |
| GO:0043547 | 7.28E-09                | 390              | 440           | positive regulation of GTPase activity    |
| GO:0016021 | 9.17E-09                | 2941             | 3764          | integral component of membrane            |
| GO:0010646 | 4.41E-08                | 2023             | 2523          | regulation of cell communication          |
| GO:0098589 | 5.90E-08                | 805              | 966           | membrane region                           |
| GO:0023051 | 1.24E-07                | 2004             | 2503          | regulation of signaling                   |
| GO:0035556 | 1.82E-07                | 1755             | 2193          | intracellular signal transduction         |
| GO:0098590 | 1.95E-07                | 666              | 795           | plasma membrane region                    |
| GO:0031012 | 2.65E-07                | 300              | 344           | extracellular matrix                      |
| GO:0044707 | 4.32E-07                | 3822             | 4888          | single-multicellular organism process     |
| GO:0032879 | 4.36E-07                | 1591             | 1980          | regulation of localization                |
| GO:0043087 | 4.96E-07                | 419              | 483           | regulation of GTPase activity             |
| GO:0044763 | 6.60E-07                | 7288             | 9529          | single-organism cellular process          |
| GO:0006022 | 6.75E-07                | 135              | 147           | aminoglycan metabolic process             |
| GO:0030054 | 9.04E-07                | 826              | 997           | cell junction                             |
| GO:0005578 | 1.73E-06                | 260              | 298           | proteinaceous extracellular matrix        |
| GO:0030203 | 2.14E-06                | 129              | 141           | glycosaminoglycan metabolic process       |
| GO:0032502 | 2.41E-06                | 3653             | 4674          | developmental process                     |
| GO:0032501 | 2.53E-06                | 4145             | 5328          | multicellular organismal process          |
| GO:0012505 | 2.73E-06                | 2382             | 3027          | endomembrane system                       |
| GO:0048856 | 4.67E-06                | 3287             | 4191          | anatomical structure development          |
| GO:0009966 | 5.02E-06                | 1758             | 2201          | regulation of signal transduction         |
| GO:0051049 | 6.63E-06                | 1172             | 1452          | regulation of transport                   |
| GO:0098805 | 6.88E-06                | 1369             | 1706          | whole membrane                            |
| GO:0044699 | 7.86E-06                | 7893             | 10366         | single-organism process                   |
| GO:0016192 | 8.34E-06                | 918              | 1126          | vesicle-mediated transport                |
| GO:0051345 | 9.14E-06                | 594              | 711           | positive regulation of hydrolase activity |
| GO:0044767 | 9.60E-06                | 3600             | 4612          | single-organism developmental process     |
| GO:0003824 | 1.19E-05                | 3457             | 4473          | catalytic activity                        |
| GO:0019898 | 1.43E-05                | 188              | 213           | extrinsic component of membrane           |
| GO:0003779 | 1.46E-05                | 298              | 344           | actin binding                             |
| GO:0043062 | 1.48E-05                | 283              | 329           | extracellular structure organization      |
| GO:0030198 | 1.59E-05                | 282              | 328           | extracellular matrix organization         |
| GO:0006464 | 1.83E-05                | 2495             | 3189          | cellular protein modification process     |
| GO:0036211 | 1.83E-05                | 2495             | 3189          | protein modification process              |
| GO:0030001 | 1.96E-05                | 550              | 664           | metal ion transport                       |
| GO:1903510 | 2.16E-05                | 97               | 105           | mucopolysaccharide metabolic process      |
| GO:0016324 | 2.29E-05                | 211              | 242           | apical plasma membrane                    |

|            |          |      |      |                                                            |
|------------|----------|------|------|------------------------------------------------------------|
| GO:0006023 | 2.90E-05 | 88   | 95   | aminoglycan biosynthetic process                           |
| GO:0019897 | 3.10E-05 | 104  | 113  | extrinsic component of plasma membrane                     |
| GO:0005096 | 3.33E-05 | 199  | 225  | GTPase activator activity                                  |
| GO:0006024 | 3.79E-05 | 87   | 94   | glycosaminoglycan biosynthetic process                     |
| GO:0022610 | 3.90E-05 | 946  | 1167 | biological adhesion                                        |
| GO:0006897 | 4.17E-05 | 419  | 499  | endocytosis                                                |
| GO:0051239 | 4.34E-05 | 1680 | 2115 | regulation of multicellular organismal process             |
| GO:0044456 | 4.82E-05 | 457  | 544  | synapse part                                               |
| GO:0007155 | 5.21E-05 | 941  | 1162 | cell adhesion                                              |
| GO:0050654 | 5.26E-05 | 49   | 50   | chondroitin sulfate proteoglycan metabolic process         |
| GO:0043412 | 5.27E-05 | 2587 | 3319 | macromolecule modification                                 |
| GO:0005085 | 5.48E-05 | 167  | 185  | guanyl-nucleotide exchange factor activity                 |
| GO:0060076 | 5.99E-05 | 171  | 192  | excitatory synapse                                         |
| GO:0008237 | 6.43E-05 | 129  | 144  | metallopeptidase activity                                  |
| GO:0048584 | 6.90E-05 | 1316 | 1658 | positive regulation of response to stimulus                |
| GO:0031226 | 7.89E-05 | 978  | 1220 | intrinsic component of plasma membrane                     |
| GO:0015629 | 7.99E-05 | 333  | 390  | actin cytoskeleton                                         |
| GO:0043197 | 8.45E-05 | 103  | 113  | dendritic spine                                            |
| GO:0098794 | 8.79E-05 | 300  | 351  | postsynapse                                                |
| GO:0030204 | 9.31E-05 | 47   | 48   | chondroitin sulfate metabolic process                      |
| GO:0043085 | 9.76E-05 | 1046 | 1295 | positive regulation of catalytic activity                  |
| GO:0045202 | 1.02E-04 | 562  | 674  | synapse                                                    |
| GO:0098552 | 1.04E-04 | 294  | 348  | side of membrane                                           |
| GO:0051336 | 1.05E-04 | 834  | 1026 | regulation of hydrolase activity                           |
| GO:0006029 | 1.09E-04 | 78   | 84   | proteoglycan metabolic process                             |
| GO:0008092 | 1.18E-04 | 598  | 723  | cytoskeletal protein binding                               |
| GO:0060627 | 1.20E-04 | 281  | 331  | regulation of vesicle-mediated transport                   |
| GO:0005887 | 1.27E-04 | 941  | 1176 | integral component of plasma membrane                      |
| GO:0051179 | 1.36E-04 | 3539 | 4558 | localization                                               |
| GO:0031234 | 1.36E-04 | 79   | 85   | extrinsic component of cytoplasmic side of plasma membrane |
| GO:0010647 | 1.41E-04 | 1071 | 1340 | positive regulation of cell communication                  |
| GO:0007275 | 1.43E-04 | 3124 | 4000 | multicellular organism development                         |
| GO:0007166 | 1.48E-04 | 1791 | 2261 | cell surface receptor signaling pathway                    |
| GO:0007229 | 1.54E-04 | 73   | 78   | integrin-mediated signaling pathway                        |
| GO:0022603 | 1.57E-04 | 637  | 774  | regulation of anatomical structure morphogenesis           |
| GO:0023056 | 1.60E-04 | 1057 | 1322 | positive regulation of signaling                           |
| GO:0044309 | 1.61E-04 | 104  | 115  | neuron spine                                               |
| GO:0048518 | 1.72E-04 | 3488 | 4487 | positive regulation of biological process                  |
| GO:0016323 | 1.78E-04 | 160  | 183  | basolateral plasma membrane                                |
| GO:0045177 | 1.80E-04 | 255  | 301  | apical part of cell                                        |
| GO:0014069 | 1.82E-04 | 162  | 183  | postsynaptic density                                       |
| GO:0099572 | 1.82E-04 | 162  | 183  | postsynaptic specialization                                |
| GO:0016773 | 1.87E-04 | 520  | 625  | phosphotransferase activity alcohol group as acceptor      |
| GO:0006950 | 1.88E-04 | 2447 | 3154 | response to stress                                         |
| GO:0044255 | 1.92E-04 | 656  | 814  | cellular lipid metabolic process                           |
| GO:0065008 | 2.02E-04 | 2252 | 2872 | regulation of biological quality                           |
| GO:0046777 | 2.05E-04 | 182  | 207  | protein autophosphorylation                                |
| GO:0006796 | 2.06E-04 | 1942 | 2474 | phosphate-containing compound metabolic process            |
| GO:0071310 | 3.01E-04 | 1530 | 1941 | cellular response to organic substance                     |
| GO:0006793 | 3.12E-04 | 1980 | 2527 | phosphorus metabolic process                               |
| GO:0005913 | 3.41E-04 | 44   | 45   | cell-cell adherens junction                                |
| GO:0016301 | 3.50E-04 | 565  | 684  | kinase activity                                            |
| GO:0004222 | 3.59E-04 | 75   | 81   | metalloendopeptidase activity                              |
| GO:0006468 | 3.63E-04 | 1205 | 1515 | protein phosphorylation                                    |
| GO:0003008 | 3.71E-04 | 1038 | 1302 | system process                                             |

|            |          |      |      |                                                                 |
|------------|----------|------|------|-----------------------------------------------------------------|
| GO:0010959 | 3.84E-04 | 233  | 273  | regulation of metal ion transport                               |
| GO:0048731 | 4.05E-04 | 2798 | 3577 | system development                                              |
| GO:1901615 | 4.10E-04 | 357  | 435  | organic hydroxy compound metabolic process                      |
| GO:0031252 | 4.16E-04 | 277  | 325  | cell leading edge                                               |
| GO:0006629 | 4.17E-04 | 828  | 1039 | lipid metabolic process                                         |
| GO:0070887 | 4.26E-04 | 1809 | 2312 | cellular response to chemical stimulus                          |
| GO:0043507 | 4.30E-04 | 55   | 58   | positive regulation of JUN kinase activity                      |
| GO:0005911 | 4.42E-04 | 275  | 325  | cell-cell junction                                              |
| GO:0006026 | 4.48E-04 | 52   | 55   | aminoglycan catabolic process                                   |
| GO:0005905 | 4.81E-04 | 54   | 57   | coated pit                                                      |
| GO:0050793 | 5.12E-04 | 1394 | 1754 | regulation of developmental process                             |
| GO:0050839 | 5.13E-04 | 135  | 153  | cell adhesion molecule binding                                  |
| GO:0031098 | 5.22E-04 | 212  | 249  | stress-activated protein kinase signaling cascade               |
| GO:0008305 | 5.38E-04 | 29   | 29   | integrin complex                                                |
| GO:0098636 | 5.38E-04 | 29   | 29   | protein complex involved in cell adhesion                       |
| GO:0004672 | 5.41E-04 | 444  | 533  | protein kinase activity                                         |
| GO:0030695 | 5.42E-04 | 217  | 252  | GTPase regulator activity                                       |
| GO:0044463 | 5.55E-04 | 681  | 834  | cell projection part                                            |
| GO:0009967 | 5.58E-04 | 966  | 1211 | positive regulation of signal transduction                      |
| GO:1902531 | 5.60E-04 | 1092 | 1369 | regulation of intracellular signal transduction                 |
| GO:0051015 | 6.17E-04 | 96   | 105  | actin filament binding                                          |
| GO:0014823 | 6.20E-04 | 53   | 57   | response to activity                                            |
| GO:0030029 | 6.39E-04 | 450  | 540  | actin filament-based process                                    |
| GO:0016740 | 6.53E-04 | 1447 | 1845 | transferase activity                                            |
| GO:0044444 | 6.72E-04 | 4927 | 6444 | cytoplasmic part                                                |
| GO:0030155 | 6.85E-04 | 421  | 512  | regulation of cell adhesion                                     |
| GO:0009898 | 6.95E-04 | 121  | 136  | cytoplasmic side of plasma membrane                             |
| GO:0046903 | 7.10E-04 | 705  | 873  | secretion                                                       |
| GO:0008270 | 7.12E-04 | 757  | 947  | zinc ion binding                                                |
| GO:0006810 | 7.56E-04 | 2800 | 3607 | transport                                                       |
| GO:0009986 | 7.60E-04 | 477  | 586  | cell surface                                                    |
| GO:0036477 | 7.64E-04 | 485  | 586  | somatodendritic compartment                                     |
| GO:0019220 | 7.65E-04 | 1115 | 1407 | regulation of phosphate metabolic process                       |
| GO:0005794 | 7.77E-04 | 952  | 1195 | Golgi apparatus                                                 |
| GO:0007257 | 7.91E-04 | 31   | 31   | activation of JUN kinase activity                               |
| GO:0070302 | 8.06E-04 | 144  | 166  | regulation of stress-activated protein kinase signaling cascade |
| GO:0032872 | 8.49E-04 | 143  | 165  | regulation of stress-activated MAPK cascade                     |
| GO:0042327 | 8.54E-04 | 691  | 861  | positive regulation of phosphorylation                          |
| GO:0004871 | 8.77E-04 | 824  | 1034 | signal transducer activity                                      |
| GO:0060079 | 8.90E-04 | 49   | 51   | excitatory postsynaptic potential                               |
| GO:0000323 | 9.10E-04 | 352  | 428  | lytic vacuole                                                   |
| GO:0005764 | 9.10E-04 | 352  | 428  | lysosome                                                        |
| GO:0010562 | 9.15E-04 | 764  | 956  | positive regulation of phosphorus metabolic process             |
| GO:0045937 | 9.15E-04 | 764  | 956  | positive regulation of phosphate metabolic process              |
| GO:0046914 | 9.53E-04 | 896  | 1132 | transition metal ion binding                                    |
| GO:0006027 | 9.84E-04 | 48   | 51   | glycosaminoglycan catabolic process                             |
| GO:0000165 | 1.01E-03 | 572  | 708  | MAPK cascade                                                    |
| GO:0016310 | 1.06E-03 | 1415 | 1796 | phosphorylation                                                 |
| GO:0034329 | 1.08E-03 | 173  | 199  | cell junction assembly                                          |
| GO:0034330 | 1.11E-03 | 194  | 225  | cell junction organization                                      |
| GO:0010033 | 1.11E-03 | 1910 | 2449 | response to organic substance                                   |
| GO:0022604 | 1.11E-03 | 379  | 454  | regulation of cell morphogenesis                                |
| GO:0051234 | 1.14E-03 | 2884 | 3720 | establishment of localization                                   |
| GO:0005737 | 1.23E-03 | 6416 | 8429 | cytoplasm                                                       |
| GO:0023014 | 1.25E-03 | 593  | 736  | signal transduction by protein phosphorylation                  |

|            |          |      |      |                                                                          |
|------------|----------|------|------|--------------------------------------------------------------------------|
| GO:0046328 | 1.27E-03 | 116  | 132  | regulation of JNK cascade                                                |
| GO:0009268 | 1.31E-03 | 32   | 33   | response to pH                                                           |
| GO:0051050 | 1.31E-03 | 605  | 753  | positive regulation of transport                                         |
| GO:0051174 | 1.34E-03 | 1121 | 1418 | regulation of phosphorus metabolic process                               |
| GO:0006898 | 1.35E-03 | 192  | 226  | receptor-mediated endocytosis                                            |
| GO:0042592 | 1.36E-03 | 989  | 1252 | homeostatic process                                                      |
| GO:0016101 | 1.38E-03 | 58   | 64   | diterpenoid metabolic process                                            |
| GO:0005773 | 1.38E-03 | 410  | 504  | vacuole                                                                  |
| GO:0051403 | 1.39E-03 | 192  | 227  | stress-activated MAPK cascade                                            |
| GO:0098562 | 1.49E-03 | 129  | 147  | cytoplasmic side of membrane                                             |
| GO:0043408 | 1.51E-03 | 523  | 647  | regulation of MAPK cascade                                               |
| GO:0006811 | 1.51E-03 | 979  | 1233 | ion transport                                                            |
| GO:0005509 | 1.55E-03 | 450  | 553  | calcium ion binding                                                      |
| GO:0009605 | 1.56E-03 | 1535 | 1959 | response to external stimulus                                            |
| GO:0003013 | 1.57E-03 | 337  | 408  | circulatory system process                                               |
| GO:0031589 | 1.61E-03 | 215  | 253  | cell-substrate adhesion                                                  |
| GO:0008360 | 1.67E-03 | 103  | 116  | regulation of cell shape                                                 |
| GO:0043269 | 1.68E-03 | 404  | 490  | regulation of ion transport                                              |
| GO:0007254 | 1.71E-03 | 139  | 161  | JNK cascade                                                              |
| GO:0007169 | 1.74E-03 | 652  | 804  | transmembrane receptor protein tyrosine kinase signaling pathway         |
| GO:0032403 | 1.80E-03 | 631  | 780  | protein complex binding                                                  |
| GO:0030016 | 1.86E-03 | 143  | 165  | myofibril                                                                |
| GO:0019900 | 1.86E-03 | 427  | 517  | kinase binding                                                           |
| GO:0010517 | 1.90E-03 | 73   | 80   | regulation of phospholipase activity                                     |
| GO:0019538 | 1.94E-03 | 3445 | 4493 | protein metabolic process                                                |
| GO:0097458 | 1.95E-03 | 905  | 1121 | neuron part                                                              |
| GO:0001934 | 1.95E-03 | 662  | 827  | positive regulation of protein phosphorylation                           |
| GO:0051240 | 2.00E-03 | 918  | 1156 | positive regulation of multicellular organismal process                  |
| GO:0042995 | 2.03E-03 | 1236 | 1549 | cell projection                                                          |
| GO:0010518 | 2.03E-03 | 67   | 73   | positive regulation of phospholipase activity                            |
| GO:0008015 | 2.11E-03 | 334  | 405  | blood circulation                                                        |
| GO:0043506 | 2.25E-03 | 66   | 72   | regulation of JUN kinase activity                                        |
| GO:0051094 | 2.38E-03 | 756  | 945  | positive regulation of developmental process                             |
| GO:0044712 | 2.41E-03 | 693  | 878  | single-organism catabolic process                                        |
| GO:0008013 | 2.52E-03 | 68   | 75   | beta-catenin binding                                                     |
| GO:0070304 | 2.62E-03 | 102  | 117  | positive regulation of stress-activated protein kinase signaling cascade |
| GO:0030166 | 2.64E-03 | 47   | 51   | proteoglycan biosynthetic process                                        |
| GO:0043406 | 2.68E-03 | 153  | 179  | positive regulation of MAP kinase activity                               |
| GO:0071216 | 2.74E-03 | 123  | 144  | cellular response to biotic stimulus                                     |
| GO:0042312 | 2.76E-03 | 34   | 36   | regulation of vasodilation                                               |
| GO:0032874 | 2.76E-03 | 101  | 116  | positive regulation of stress-activated MAPK cascade                     |
| GO:0046330 | 2.79E-03 | 85   | 96   | positive regulation of JNK cascade                                       |
| GO:0050878 | 2.80E-03 | 466  | 575  | regulation of body fluid levels                                          |
| GO:0098588 | 2.81E-03 | 1494 | 1925 | bounding membrane of organelle                                           |
| GO:0050790 | 2.82E-03 | 1495 | 1902 | regulation of catalytic activity                                         |
| GO:0006720 | 2.91E-03 | 75   | 86   | isoprenoid metabolic process                                             |
| GO:0043235 | 2.91E-03 | 232  | 276  | receptor complex                                                         |
| GO:0046873 | 2.95E-03 | 293  | 351  | metal ion transmembrane transporter activity                             |
| GO:0044437 | 2.97E-03 | 270  | 327  | vacuolar part                                                            |
| GO:0005086 | 2.99E-03 | 23   | 23   | ARF guanyl-nucleotide exchange factor activity                           |
| GO:0051056 | 3.06E-03 | 222  | 260  | regulation of small GTPase mediated signal transduction                  |
| GO:0031399 | 3.07E-03 | 1162 | 1476 | regulation of protein modification process                               |
| GO:0008194 | 3.14E-03 | 93   | 108  | UDP-glycosyltransferase activity                                         |
| GO:0043292 | 3.14E-03 | 149  | 174  | contractile fiber                                                        |
| GO:0044093 | 3.19E-03 | 1200 | 1512 | positive regulation of molecular function                                |

|            |          |      |      |                                                                |
|------------|----------|------|------|----------------------------------------------------------------|
| GO:0004620 | 3.20E-03 | 61   | 68   | phospholipase activity                                         |
| GO:0031641 | 3.21E-03 | 31   | 32   | regulation of myelination                                      |
| GO:0006066 | 3.22E-03 | 249  | 303  | alcohol metabolic process                                      |
| GO:0055085 | 3.26E-03 | 895  | 1129 | transmembrane transport                                        |
| GO:1901701 | 3.28E-03 | 710  | 891  | cellular response to oxygen-containing compound                |
| GO:0005604 | 3.31E-03 | 77   | 86   | basement membrane                                              |
| GO:1990778 | 3.34E-03 | 155  | 181  | protein localization to cell periphery                         |
| GO:0004674 | 3.35E-03 | 331  | 397  | protein serine/threonine kinase activity                       |
| GO:0019725 | 3.38E-03 | 505  | 629  | cellular homeostasis                                           |
| GO:0065009 | 3.44E-03 | 1800 | 2298 | regulation of molecular function                               |
| GO:0031253 | 3.49E-03 | 213  | 253  | cell projection membrane                                       |
| GO:0033173 | 3.50E-03 | 22   | 22   | calcineurin-NFAT signaling cascade                             |
| GO:0051046 | 3.53E-03 | 453  | 560  | regulation of secretion                                        |
| GO:0044710 | 3.55E-03 | 3352 | 4389 | single-organism metabolic process                              |
| GO:0060191 | 3.66E-03 | 83   | 93   | regulation of lipase activity                                  |
| GO:0018209 | 3.74E-03 | 186  | 219  | peptidyl-serine modification                                   |
| GO:0031256 | 3.77E-03 | 106  | 121  | leading edge membrane                                          |
| GO:0032940 | 3.77E-03 | 618  | 769  | secretion by cell                                              |
| GO:0016772 | 3.83E-03 | 646  | 800  | transferase activity transferring phosphorus-containing groups |
| GO:0072659 | 3.85E-03 | 154  | 180  | protein localization to plasma membrane                        |
| GO:0031623 | 3.88E-03 | 60   | 67   | receptor internalization                                       |
| GO:0005088 | 3.90E-03 | 108  | 120  | Ras guanyl-nucleotide exchange factor activity                 |
| GO:0055082 | 3.94E-03 | 425  | 527  | cellular chemical homeostasis                                  |
| GO:0030036 | 3.95E-03 | 393  | 475  | actin cytoskeleton organization                                |
| GO:0042221 | 4.00E-03 | 2507 | 3242 | response to chemical                                           |
| GO:0099568 | 4.02E-03 | 191  | 226  | cytoplasmic region                                             |
| GO:0048016 | 4.08E-03 | 30   | 31   | inositol phosphate-mediated signaling                          |
| GO:0008610 | 4.11E-03 | 422  | 527  | lipid biosynthetic process                                     |
| GO:0005089 | 4.14E-03 | 68   | 73   | Rho guanyl-nucleotide exchange factor activity                 |
| GO:0044449 | 4.16E-03 | 139  | 162  | contractile fiber part                                         |
| GO:0043410 | 4.23E-03 | 405  | 501  | positive regulation of MAPK cascade                            |
| GO:0007202 | 4.25E-03 | 49   | 53   | activation of phospholipase C activity                         |
| GO:0042325 | 4.27E-03 | 965  | 1224 | regulation of phosphorylation                                  |
| GO:0005912 | 4.32E-03 | 340  | 411  | adherens junction                                              |
| GO:0045597 | 4.35E-03 | 557  | 692  | positive regulation of cell differentiation                    |
| GO:0038083 | 4.35E-03 | 38   | 40   | peptidyl-tyrosine autophosphorylation                          |
| GO:0016757 | 4.36E-03 | 181  | 221  | transferase activity transferring glycosyl groups              |
| GO:0098772 | 4.41E-03 | 807  | 1010 | molecular function regulator                                   |
| GO:0006816 | 4.42E-03 | 261  | 314  | calcium ion transport                                          |
| GO:0098602 | 4.46E-03 | 499  | 618  | single organism cell adhesion                                  |
| GO:0019901 | 4.48E-03 | 379  | 460  | protein kinase binding                                         |
| GO:0006812 | 4.63E-03 | 659  | 826  | cation transport                                               |
| GO:0005516 | 4.71E-03 | 139  | 161  | calmodulin binding                                             |
| GO:0030276 | 4.81E-03 | 52   | 57   | clathrin binding                                               |
| GO:0005903 | 4.83E-03 | 76   | 85   | brush border                                                   |
| GO:0080135 | 4.90E-03 | 437  | 544  | regulation of cellular response to stress                      |
| GO:0042127 | 4.93E-03 | 945  | 1204 | regulation of cell proliferation                               |
| GO:0048878 | 5.02E-03 | 644  | 809  | chemical homeostasis                                           |
| GO:0016787 | 5.04E-03 | 1462 | 1885 | hydrolase activity                                             |
| GO:0050806 | 5.06E-03 | 96   | 110  | positive regulation of synaptic transmission                   |
| GO:0030201 | 5.28E-03 | 27   | 28   | heparan sulfate proteoglycan metabolic process                 |
| GO:0098797 | 5.34E-03 | 350  | 425  | plasma membrane protein complex                                |
| GO:0008047 | 5.41E-03 | 312  | 379  | enzyme activator activity                                      |
| GO:0050840 | 5.43E-03 | 37   | 40   | extracellular matrix binding                                   |
| GO:0006887 | 5.56E-03 | 251  | 303  | exocytosis                                                     |

|            |          |      |      |                                                          |
|------------|----------|------|------|----------------------------------------------------------|
| GO:0001523 | 5.56E-03 | 52   | 58   | retinoid metabolic process                               |
| GO:0060078 | 5.57E-03 | 58   | 63   | regulation of postsynaptic membrane potential            |
| GO:0007009 | 5.58E-03 | 198  | 234  | plasma membrane organization                             |
| GO:1901136 | 5.58E-03 | 125  | 148  | carbohydrate derivative catabolic process                |
| GO:0005938 | 5.58E-03 | 176  | 208  | cell cortex                                              |
| GO:0009628 | 5.70E-03 | 766  | 970  | response to abiotic stimulus                             |
| GO:1900274 | 5.77E-03 | 58   | 64   | regulation of phospholipase C activity                   |
| GO:0018105 | 5.92E-03 | 177  | 209  | peptidyl-serine phosphorylation                          |
| GO:0009611 | 5.99E-03 | 662  | 831  | response to wounding                                     |
| GO:0008289 | 6.03E-03 | 418  | 517  | lipid binding                                            |
| GO:0009653 | 6.08E-03 | 1811 | 2310 | anatomical structure morphogenesis                       |
| GO:1902533 | 6.11E-03 | 649  | 817  | positive regulation of intracellular signal transduction |
| GO:0007610 | 6.24E-03 | 503  | 622  | behavior                                                 |
| GO:0044420 | 6.32E-03 | 98   | 112  | extracellular matrix component                           |
| GO:0045807 | 6.32E-03 | 81   | 93   | positive regulation of endocytosis                       |
| GO:0006955 | 6.33E-03 | 995  | 1277 | immune response                                          |
| GO:0044877 | 6.35E-03 | 943  | 1187 | macromolecular complex binding                           |
| GO:0048771 | 6.36E-03 | 104  | 122  | tissue remodeling                                        |
| GO:0070161 | 6.37E-03 | 351  | 426  | anchoring junction                                       |
| GO:0030100 | 6.49E-03 | 139  | 164  | regulation of endocytosis                                |
| GO:0072511 | 6.51E-03 | 292  | 356  | divalent inorganic cation transport                      |
| GO:0042060 | 6.52E-03 | 474  | 588  | wound healing                                            |
| GO:0031410 | 6.62E-03 | 810  | 1027 | cytoplasmic vesicle                                      |
| GO:0051020 | 6.63E-03 | 207  | 246  | GTPase binding                                           |
| GO:0072358 | 6.72E-03 | 638  | 797  | cardiovascular system development                        |
| GO:0072359 | 6.72E-03 | 638  | 797  | circulatory system development                           |
| GO:0098862 | 6.74E-03 | 102  | 117  | cluster of actin-based cell projections                  |
| GO:0001948 | 6.77E-03 | 72   | 81   | glycoprotein binding                                     |
| GO:0044765 | 6.93E-03 | 2441 | 3159 | single-organism transport                                |
| GO:0000187 | 6.95E-03 | 98   | 113  | activation of MAPK activity                              |
| GO:0031401 | 7.05E-03 | 795  | 1005 | positive regulation of protein modification process      |
| GO:0007272 | 7.06E-03 | 86   | 98   | ensheathment of neurons                                  |
| GO:0008366 | 7.06E-03 | 86   | 98   | axon ensheathment                                        |
| GO:0031526 | 7.09E-03 | 40   | 43   | brush border membrane                                    |
| GO:0065007 | 7.12E-03 | 6550 | 8610 | biological regulation                                    |
| GO:0043236 | 7.17E-03 | 24   | 25   | laminin binding                                          |
| GO:0033003 | 7.21E-03 | 26   | 27   | regulation of mast cell activation                       |
| GO:0046916 | 7.30E-03 | 69   | 80   | cellular transition metal ion homeostasis                |
| GO:0050650 | 7.33E-03 | 25   | 26   | chondroitin sulfate proteoglycan biosynthetic process    |
| GO:0031674 | 7.37E-03 | 91   | 103  | I band                                                   |
| GO:0002761 | 7.38E-03 | 77   | 88   | regulation of myeloid leukocyte differentiation          |
| GO:0030316 | 7.52E-03 | 64   | 72   | osteoclast differentiation                               |
| GO:0007268 | 7.54E-03 | 500  | 614  | synaptic transmission                                    |
| GO:0099536 | 7.54E-03 | 500  | 614  | synaptic signaling                                       |
| GO:0099537 | 7.54E-03 | 500  | 614  | trans-synaptic signaling                                 |
| GO:0001817 | 7.59E-03 | 364  | 458  | regulation of cytokine production                        |
| GO:0071219 | 7.63E-03 | 108  | 127  | cellular response to molecule of bacterial origin        |
| GO:0030425 | 7.67E-03 | 346  | 419  | dendrite                                                 |
| GO:0010863 | 7.78E-03 | 56   | 62   | positive regulation of phospholipase C activity          |
| GO:0070838 | 7.84E-03 | 290  | 354  | divalent metal ion transport                             |
| GO:0045017 | 7.88E-03 | 190  | 229  | glycerolipid biosynthetic process                        |
| GO:0060589 | 7.89E-03 | 227  | 271  | nucleoside-triphosphatase regulator activity             |
| GO:0016337 | 7.92E-03 | 465  | 578  | single organismal cell-cell adhesion                     |
| GO:2000036 | 8.04E-03 | 19   | 19   | regulation of stem cell population maintenance           |
| GO:0046578 | 8.05E-03 | 149  | 172  | regulation of Ras protein signal transduction            |

|            |          |      |      |                                             |
|------------|----------|------|------|---------------------------------------------|
| GO:0010043 | 8.05E-03 | 37   | 41   | response to zinc ion                        |
| GO:0046486 | 8.08E-03 | 253  | 309  | glycerolipid metabolic process              |
| GO:0010506 | 8.25E-03 | 144  | 172  | regulation of autophagy                     |
| GO:0060193 | 8.25E-03 | 73   | 82   | positive regulation of lipase activity      |
| GO:0022617 | 8.25E-03 | 94   | 109  | extracellular matrix disassembly            |
| GO:0005576 | 8.31E-03 | 2522 | 3309 | extracellular region                        |
| GO:0030018 | 8.32E-03 | 81   | 91   | Z disc                                      |
| GO:0006836 | 8.36E-03 | 141  | 165  | neurotransmitter transport                  |
| GO:0006721 | 8.41E-03 | 61   | 70   | terpenoid metabolic process                 |
| GO:0016298 | 8.45E-03 | 69   | 79   | lipase activity                             |
| GO:0042641 | 8.57E-03 | 52   | 56   | actomyosin                                  |
| GO:0005856 | 8.57E-03 | 1256 | 1598 | cytoskeleton                                |
| GO:0045216 | 8.59E-03 | 167  | 197  | cell-cell junction organization             |
| GO:0004629 | 8.61E-03 | 25   | 26   | phospholipase C activity                    |
| GO:0002448 | 8.68E-03 | 31   | 33   | mast cell mediated immunity                 |
| GO:0031267 | 8.87E-03 | 190  | 225  | small GTPase binding                        |
| GO:0042578 | 8.90E-03 | 234  | 286  | phosphoric ester hydrolase activity         |
| GO:0050865 | 8.92E-03 | 301  | 372  | regulation of cell activation               |
| GO:0001725 | 9.06E-03 | 44   | 47   | stress fiber                                |
| GO:0097517 | 9.06E-03 | 44   | 47   | contractile actin filament bundle           |
| GO:1903530 | 9.17E-03 | 413  | 513  | regulation of secretion by cell             |
| GO:0030017 | 9.19E-03 | 125  | 146  | sarcomere                                   |
| GO:0071214 | 9.22E-03 | 201  | 246  | cellular response to abiotic stimulus       |
| GO:0005615 | 9.25E-03 | 712  | 921  | extracellular space                         |
| GO:0071222 | 9.30E-03 | 103  | 121  | cellular response to lipopolysaccharide     |
| GO:0045670 | 9.36E-03 | 45   | 50   | regulation of osteoclast differentiation    |
| GO:0071495 | 9.37E-03 | 905  | 1148 | cellular response to endogenous stimulus    |
| GO:0010038 | 9.54E-03 | 220  | 269  | response to metal ion                       |
| GO:0005102 | 9.56E-03 | 874  | 1116 | receptor binding                            |
| GO:0008233 | 9.57E-03 | 366  | 461  | peptidase activity                          |
| GO:0010975 | 9.61E-03 | 296  | 355  | regulation of neuron projection development |
| GO:0010447 | 9.81E-03 | 16   | 16   | response to acidic pH                       |
| GO:0043168 | 9.84E-03 | 1718 | 2202 | anion binding                               |
| GO:0016788 | 9.92E-03 | 432  | 544  | hydrolase activity acting on ester bonds    |
