# Supplementary material for: Variations in 5-methylcytosine and 5-hydroxymethylcytosine among human brain, blood, and saliva using oxBS and the Infinium MethylationEPIC array
Source: PubMed Central journal article supplement — Biol Methods Protoc. 2016 Dec 27;1(1):1–8. doi: 10.1093/biomethods/bpw002 (PMC7164292; doi:10.1093/biomethods/bpw002), 2016-12-27
Supplement: supplementary_table_s4.pdf [file supplementary_table_s4.pdf]

**Supplementary Table S4: Significant GO terms (p < 0.01) related to the 5hmC-containing probes in Fantom5 Enhancer Regions**

Category = Gene ontology category

Over\_represented pvalue = p-value of the overrepresented gene ontology term

Number DE In Cat = The number of differentially expressed genes in the gene ontology category

Number In Cat = The total number of genes in the gene ontology category

GO term = Specific gene ontology term in the category

| Category   | over_represented pvalue | number DE In Cat | number In Cat | GO term                                                                                     |
|------------|-------------------------|------------------|---------------|---------------------------------------------------------------------------------------------|
| GO:0009306 | 8.64E-05                | 141              | 164           | protein secretion                                                                           |
| GO:0002252 | 1.88E-04                | 213              | 256           | immune effector process                                                                     |
| GO:0065003 | 2.04E-04                | 347              | 431           | macromolecular complex assembly                                                             |
| GO:0006897 | 2.28E-04                | 199              | 236           | endocytosis                                                                                 |
| GO:0009611 | 3.02E-04                | 324              | 396           | response to wounding                                                                        |
| GO:0050708 | 3.02E-04                | 114              | 132           | regulation of protein secretion                                                             |
| GO:0098602 | 3.35E-04                | 269              | 326           | single organism cell adhesion                                                               |
| GO:0001775 | 3.37E-04                | 307              | 375           | cell activation                                                                             |
| GO:0016337 | 4.21E-04                | 248              | 300           | single organismal cell-cell adhesion                                                        |
| GO:0034622 | 4.93E-04                | 176              | 212           | cellular macromolecular complex assembly                                                    |
| GO:0022607 | 4.98E-04                | 580              | 737           | cellular component assembly                                                                 |
| GO:0006461 | 5.54E-04                | 312              | 387           | protein complex assembly                                                                    |
| GO:0070271 | 5.54E-04                | 312              | 387           | protein complex biogenesis                                                                  |
| GO:0022610 | 7.15E-04                | 466              | 584           | biological adhesion                                                                         |
| GO:0007155 | 7.94E-04                | 465              | 583           | cell adhesion                                                                               |
| GO:0030155 | 8.08E-04                | 230              | 278           | regulation of cell adhesion                                                                 |
| GO:0098609 | 8.18E-04                | 285              | 350           | cell-cell adhesion                                                                          |
| GO:0044085 | 8.28E-04                | 595              | 760           | cellular component biogenesis                                                               |
| GO:0051234 | 1.02E-03                | 1067             | 1399          | establishment of localization                                                               |
| GO:0009617 | 1.89E-03                | 132              | 157           | response to bacterium                                                                       |
| GO:0045321 | 2.09E-03                | 232              | 284           | leukocyte activation                                                                        |
| GO:0060627 | 2.12E-03                | 126              | 150           | regulation of vesicle-mediated transport                                                    |
| GO:0016323 | 2.12E-03                | 72               | 83            | basolateral plasma membrane                                                                 |
| GO:0016020 | 2.40E-03                | 1880             | 2506          | membrane                                                                                    |
| GO:0009064 | 2.46E-03                | 18               | 18            | glutamine family amino acid metabolic process                                               |
| GO:0006810 | 2.67E-03                | 1034             | 1361          | transport                                                                                   |
| GO:0016192 | 2.77E-03                | 382              | 482           | vesicle-mediated transport                                                                  |
| GO:0071702 | 2.80E-03                | 575              | 747           | organic substance transport                                                                 |
| GO:0051179 | 2.93E-03                | 1355             | 1788          | localization                                                                                |
| GO:0002521 | 2.96E-03                | 167              | 201           | leukocyte differentiation                                                                   |
| GO:0072593 | 3.14E-03                | 67               | 76            | reactive oxygen species metabolic process                                                   |
| GO:0031099 | 3.42E-03                | 58               | 65            | regeneration                                                                                |
| GO:0071216 | 3.42E-03                | 59               | 66            | cellular response to biotic stimulus                                                        |
| GO:0032940 | 3.50E-03                | 261              | 327           | secretion by cell                                                                           |
| GO:0010876 | 3.52E-03                | 87               | 102           | lipid localization                                                                          |
| GO:0071219 | 3.59E-03                | 55               | 61            | cellular response to molecule of bacterial origin                                           |
| GO:0006909 | 3.81E-03                | 83               | 96            | phagocytosis                                                                                |
| GO:0002274 | 3.84E-03                | 57               | 64            | myeloid leukocyte activation                                                                |
| GO:0030097 | 4.03E-03                | 233              | 286           | hemopoiesis                                                                                 |
| GO:0071222 | 4.21E-03                | 54               | 60            | cellular response to lipopolysaccharide                                                     |
| GO:0044765 | 4.28E-03                | 911              | 1200          | single-organism transport                                                                   |
| GO:0032101 | 4.51E-03                | 251              | 312           | regulation of response to external stimulus                                                 |
| GO:1902578 | 4.58E-03                | 955              | 1259          | single-organism localization                                                                |
| GO:0019439 | 4.79E-03                | 73               | 86            | aromatic compound catabolic process                                                         |
| GO:0044425 | 4.94E-03                | 1382             | 1839          | membrane part                                                                               |
| GO:1901564 | 4.95E-03                | 421              | 542           | organonitrogen compound metabolic process                                                   |
| GO:2000377 | 5.39E-03                | 44               | 49            | regulation of reactive oxygen species metabolic process                                     |
| GO:0006890 | 5.43E-03                | 15               | 15            | retrograde vesicle-mediated transport Golgi to ER                                           |
| GO:0001817 | 5.48E-03                | 156              | 191           | regulation of cytokine production                                                           |
| GO:0097529 | 5.55E-03                | 53               | 60            | myeloid leukocyte migration                                                                 |
| GO:0002433 | 5.56E-03                | 38               | 41            | immune response-regulating cell surface receptor signaling pathway involved in phagocytosis |
| GO:0038094 | 5.56E-03                | 38               | 41            | Fc-gamma receptor signaling pathway                                                         |
| GO:0038096 | 5.56E-03                | 38               | 41            | Fc-gamma receptor signaling pathway involved in phagocytosis                                |
| GO:0043623 | 5.64E-03                | 130              | 157           | cellular protein complex assembly                                                           |

|            |          |     |      |                                                                    |
|------------|----------|-----|------|--------------------------------------------------------------------|
| GO:1903530 | 5.68E-03 | 168 | 207  | regulation of secretion by cell                                    |
| GO:0007169 | 5.69E-03 | 311 | 390  | transmembrane receptor protein tyrosine kinase signaling pathway   |
| GO:0042060 | 5.77E-03 | 232 | 286  | wound healing                                                      |
| GO:0051345 | 5.78E-03 | 271 | 335  | positive regulation of hydrolase activity                          |
| GO:0061695 | 6.06E-03 | 48  | 54   | transferase complex transferring phosphorus-containing groups      |
| GO:0002520 | 6.09E-03 | 250 | 309  | immune system development                                          |
| GO:0000784 | 6.20E-03 | 15  | 15   | nuclear chromosome telomeric region                                |
| GO:0033036 | 6.33E-03 | 635 | 827  | macromolecule localization                                         |
| GO:0034655 | 6.34E-03 | 57  | 66   | nucleobase-containing compound catabolic process                   |
| GO:0002429 | 6.50E-03 | 116 | 138  | immune response-activating cell surface receptor signaling pathway |
| GO:0002444 | 6.73E-03 | 29  | 31   | myeloid leukocyte mediated immunity                                |
| GO:0044281 | 6.78E-03 | 523 | 678  | small molecule metabolic process                                   |
| GO:0005070 | 6.92E-03 | 30  | 32   | SH3/SH2 adaptor activity                                           |
| GO:0043207 | 7.06E-03 | 210 | 260  | response to external biotic stimulus                               |
| GO:0051707 | 7.06E-03 | 210 | 260  | response to other organism                                         |
| GO:0007167 | 7.06E-03 | 394 | 499  | enzyme linked receptor protein signaling pathway                   |
| GO:0043933 | 7.27E-03 | 525 | 677  | macromolecular complex subunit organization                        |
| GO:0010811 | 7.35E-03 | 41  | 45   | positive regulation of cell-substrate adhesion                     |
| GO:0099568 | 7.48E-03 | 94  | 111  | cytoplasmic region                                                 |
| GO:0002250 | 7.51E-03 | 106 | 128  | adaptive immune response                                           |
| GO:0031102 | 7.59E-03 | 18  | 18   | neuron projection regeneration                                     |
| GO:0006869 | 8.13E-03 | 78  | 92   | lipid transport                                                    |
| GO:1901361 | 8.21E-03 | 77  | 92   | organic cyclic compound catabolic process                          |
| GO:0009607 | 8.27E-03 | 217 | 270  | response to biotic stimulus                                        |
| GO:0046649 | 8.28E-03 | 198 | 244  | lymphocyte activation                                              |
| GO:0002431 | 8.33E-03 | 41  | 45   | Fc receptor mediated stimulatory signaling pathway                 |
| GO:0006954 | 8.39E-03 | 168 | 207  | inflammatory response                                              |
| GO:0019637 | 8.44E-03 | 232 | 291  | organophosphate metabolic process                                  |
| GO:0015711 | 8.60E-03 | 107 | 130  | organic anion transport                                            |
| GO:0002237 | 8.81E-03 | 100 | 119  | response to molecule of bacterial origin                           |
| GO:0048534 | 8.89E-03 | 242 | 300  | hematopoietic or lymphoid organ development                        |
| GO:0050778 | 8.91E-03 | 190 | 235  | positive regulation of immune response                             |
| GO:0051046 | 9.24E-03 | 181 | 225  | regulation of secretion                                            |
| GO:0002263 | 9.64E-03 | 69  | 80   | cell activation involved in immune response                        |
| GO:0006950 | 9.88E-03 | 909 | 1192 | response to stress                                                 |
